# Supplementary material for: Structure–property relationships in TMD materials AB2 (A = Nb, Ta; B = S, Se, Te): assessing exchange–correlation functionals
Source: Royal Society of Chemistry journal article supplement (doi:10.1039/d4nj03076a), 2024-01-01
Supplement: d4nj03076a1.pdf [file d4nj03076a1.pdf]

## Supporting Information

### Structure-Property Relationships in TMD Materials AB<sub>2</sub> (A = Nb, Ta; B = S, Se, Te):

#### Assessing Exchange-Correlation Functionals

Sushant Kumar Behera, Praveen C Ramamurthy

*Organic Nano Electronic Group, Department of Materials Engineering, Indian Institute of Science, Bangalore -560012, India.*

Email: [onegroupb203@gmail.com](mailto:onegroupb203@gmail.com)

### Non-Spin orbit Coupling (NSOC) Case:

**Table S1:** Details of the geometry optimization for all the 06 systems are tabulated below for LDA XC functional.

| Functional | System            | Phase | a(Å)   |        | c(Å)   |        | A-B (Å) |       | Angle (°) |        | vdW gap (Å) |       |
|------------|-------------------|-------|--------|--------|--------|--------|---------|-------|-----------|--------|-------------|-------|
|            |                   |       | Cal.   | Expt.  | Cal.   | Expt.  | Cal.    | Expt. | Cal.      | Expt.  | Cal.        | Expt. |
| LDA        | NbS <sub>2</sub>  | 2H    | 3.284  | 3.368  | 11.408 | 12.624 | 2.457   | 2.495 | 78.954    | 77.575 | 3.200       | 3.732 |
|            |                   | 1T    | 3.301  | 3.403  | 5.671  | 6.202  | 2.460   | 2.489 | 95.704    | 93.767 | 3.192       | 3.707 |
|            | NbSe <sub>2</sub> | 2H    | 3.404  | 3.499  | 12.103 | 13.413 | 2.580   | 2.622 | 80.750    | 79.201 | 3.345       | 3.924 |
|            |                   | 1T    | 3.412  | 3.518  | 6.037  | 6.528  | 2.583   | 2.614 | 97.308    | 95.431 | 3.339       | 3.820 |
|            | NbTe <sub>2</sub> | 2H    | 14.343 | 15.067 | 9.204  | 9.607  | 2.803   | 2.841 | 79.655    | 81.262 | 3.387       | 3.732 |
|            |                   | 1T    | 3.622  | 3.720  | 6.556  | 7.148  | 2.771   | 2.814 | 98.387    | 97.247 | 3.591       | 4.116 |
|            | TaS <sub>2</sub>  | 2H    | 3.267  | 3.320  | 11.594 | 12.300 | 2.445   | 2.488 | 79.037    | 79.234 | 3.281       | 3.540 |
|            |                   | 1T    | 3.293  | 3.360  | 5.714  | 5.900  | 2.445   | 2.436 | 95.319    | 92.837 | 3.254       | 3.530 |
|            | TaSe <sub>2</sub> | 2H    | 3.389  | 3.476  | 12.231 | 13.418 | 2.568   | 2.607 | 80.762    | 79.354 | 3.405       | 3.930 |
|            |                   | 1T    | 3.407  | 3.509  | 6.087  | 6.599  | 2.568   | 2.599 | 96.888    | 95.058 | 3.410       | 3.910 |
|            | TaTe <sub>2</sub> | 2H    | 14.438 | 15.235 | 9.328  | 9.651  | 2.797   | 2.833 | 81.514    | 81.158 | 3.489       | 3.814 |
|            |                   | 1T    | 3.618  | 3.740  | 6.626  | 6.732  | 2.761   | 2.599 | 98.027    | 97.636 | 3.679       | 3.886 |

**Table S2:** Details of the geometry optimization for all the 06 systems are tabulated below for PBE XC functional.

| Functional | System            | Phase | a(Å)   |        | c(Å)   |        | A-B (Å) |       | Angle (°) |        | vdW gap (Å) |       |
|------------|-------------------|-------|--------|--------|--------|--------|---------|-------|-----------|--------|-------------|-------|
|            |                   |       | Cal.   | Expt.  | Cal.   | Expt.  | Cal.    | Expt. | Cal.      | Expt.  | Cal.        | Expt. |
| PBE        | NbS <sub>2</sub>  | 2H    | 3.356  | 3.368  | 13.667 | 12.624 | 2.492   | 2.495 | 77.926    | 77.575 | 4.169       | 3.732 |
|            |                   | 1T    | 3.382  | 3.403  | 6.666  | 6.202  | 2.493   | 2.489 | 94.592    | 93.767 | 4.064       | 3.707 |
|            | NbSe <sub>2</sub> | 2H    | 3.481  | 3.499  | 13.728 | 13.413 | 2.622   | 2.622 | 79.932    | 79.201 | 4.027       | 3.924 |
|            |                   | 1T    | 3.492  | 3.518  | 6.802  | 6.528  | 2.623   | 2.614 | 96.518    | 95.431 | 3.994       | 3.820 |
|            | NbTe <sub>2</sub> | 2H    | 15.184 | 15.067 | 9.628  | 9.607  | 2.852   | 2.841 | 81.201    | 81.262 | 3.712       | 3.732 |
|            |                   | 1T    | 3.683  | 3.720  | 7.360  | 7.148  | 2.818   | 2.814 | 98.376    | 97.247 | 4.235       | 4.116 |
|            | TaS <sub>2</sub>  | 2H    | 3.336  | 3.320  | 13.820 | 12.300 | 2.479   | 2.488 | 78.049    | 79.234 | 4.246       | 3.540 |
|            |                   | 1T    | 3.369  | 3.360  | 6.712  | 5.900  | 2.478   | 2.436 | 94.345    | 92.837 | 4.128       | 3.530 |
|            | TaSe <sub>2</sub> | 2H    | 3.466  | 3.476  | 14.249 | 13.418 | 2.609   | 2.607 | 79.854    | 79.354 | 4.285       | 3.930 |
|            |                   | 1T    | 3.491  | 3.509  | 6.918  | 6.599  | 2.608   | 2.599 | 95.962    | 95.058 | 4.133       | 3.910 |
|            | TaTe <sub>2</sub> | 2H    | 15.354 | 15.235 | 9.686  | 9.651  | 2.844   | 2.833 | 81.001    | 81.158 | 3.911       | 3.814 |
|            |                   | 1T    | 3.685  | 3.740  | 7.380  | 6.732  | 2.806   | 2.599 | 97.883    | 97.636 | 4.301       | 3.886 |

**Table S3:** Details of the geometry optimization for all the 06 systems are tabulated below for PBESol XC functional.

| Functional | System            | Phase | a(Å)   |        | c(Å)   |        | A-B (Å) |       | Angle (°) |        | vdW gap (Å) |       |
|------------|-------------------|-------|--------|--------|--------|--------|---------|-------|-----------|--------|-------------|-------|
|            |                   |       | Cal.   | Expt.  | Cal.   | Expt.  | Cal.    | Expt. | Cal.      | Expt.  | Cal.        | Expt. |
| PBESol     | NbS <sub>2</sub>  | 2H    | 3.306  | 3.368  | 11.854 | 12.624 | 2.469   | 2.495 | 78.764    | 77.575 | 3.387       | 3.732 |
|            |                   | 1T    | 3.324  | 3.403  | 5.846  | 6.202  | 2.471   | 2.489 | 95.505    | 93.767 | 3.337       | 3.707 |
|            | NbSe <sub>2</sub> | 2H    | 3.425  | 3.499  | 12.355 | 13.413 | 2.594   | 2.622 | 80.686    | 79.201 | 3.448       | 3.924 |
|            |                   | 1T    | 3.432  | 3.518  | 6.185  | 6.528  | 2.597   | 2.614 | 97.273    | 95.431 | 3.453       | 3.820 |
|            | NbTe <sub>2</sub> | 2H    | 14.848 | 15.067 | 9.402  | 9.607  | 2.825   | 2.841 | 81.417    | 81.262 | 3.547       | 3.732 |
|            |                   | 1T    | 3.640  | 3.720  | 6.667  | 7.148  | 2.787   | 2.814 | 98.466    | 97.247 | 3.667       | 4.116 |
|            | TaS <sub>2</sub>  | 2H    | 3.292  | 3.320  | 12.161 | 12.300 | 2.458   | 2.488 | 78.741    | 79.234 | 3.519       | 3.540 |
|            |                   | 1T    | 3.317  | 3.360  | 5.923  | 5.900  | 2.459   | 2.436 | 95.135    | 92.837 | 3.425       | 3.530 |
|            | TaSe <sub>2</sub> | 2H    | 3.413  | 3.476  | 12.623 | 13.418 | 2.584   | 2.607 | 80.617    | 79.354 | 3.560       | 3.930 |
|            |                   | 1T    | 3.429  | 3.509  | 6.256  | 6.599  | 2.583   | 2.599 | 96.813    | 95.058 | 3.543       | 3.910 |
|            | TaTe <sub>2</sub> | 2H    | 15.235 | 15.235 | 9.651  | 9.651  | 2.833   | 2.833 | 81.185    | 81.158 | 3.905       | 3.814 |
|            |                   | 1T    | 3.646  | 3.740  | 6.882  | 6.732  | 2.773   | 2.599 | 98.667    | 97.636 | 3.865       | 3.886 |

**Table S4:** Details of the geometry optimization for all the 06 systems are tabulated below for SCAN XC functional.

| Functional | System            | Phase | a(Å)   |        | c(Å)   |        | A-B (Å) |       | Angle (°) |        | vdW gap (Å) |       |
|------------|-------------------|-------|--------|--------|--------|--------|---------|-------|-----------|--------|-------------|-------|
|            |                   |       | Cal.   | Expt.  | Cal.   | Expt.  | Cal.    | Expt. | Cal.      | Expt.  | Cal.        | Expt. |
| SCAN       | NbS <sub>2</sub>  | 2H    | 3.363  | 3.368  | 12.735 | 12.624 | 2.490   | 2.495 | 77.526    | 77.575 | 3.785       | 3.732 |
|            |                   | 1T    | 3.385  | 3.403  | 6.047  | 6.202  | 2.490   | 2.489 | 94.351    | 93.767 | 3.548       | 3.707 |
|            | NbSe <sub>2</sub> | 2H    | 3.478  | 3.499  | 13.134 | 13.413 | 2.609   | 2.622 | 79.350    | 79.201 | 3.807       | 3.924 |
|            |                   | 1T    | 3.506  | 3.518  | 6.378  | 6.528  | 2.613   | 2.614 | 95.734    | 95.431 | 3.680       | 3.820 |
|            | NbTe <sub>2</sub> | 2H    | 15.067 | 15.067 | 9.607  | 9.607  | 2.841   | 2.841 | 81.773    | 81.262 | 3.836       | 3.732 |
|            |                   | 1T    | 3.656  | 3.720  | 7.170  | 7.148  | 2.794   | 2.814 | 98.299    | 97.247 | 4.092       | 4.116 |
|            | TaS <sub>2</sub>  | 2H    | 3.319  | 3.320  | 12.161 | 12.300 | 2.464   | 2.488 | 77.921    | 79.234 | 3.543       | 3.540 |
|            |                   | 1T    | 3.359  | 3.360  | 5.993  | 5.900  | 2.463   | 2.436 | 93.996    | 92.837 | 3.536       | 3.530 |
|            | TaSe <sub>2</sub> | 2H    | 3.445  | 3.476  | 13.224 | 13.418 | 2.585   | 2.607 | 79.376    | 79.354 | 3.861       | 3.930 |
|            |                   | 1T    | 3.482  | 3.509  | 6.640  | 6.599  | 2.583   | 2.599 | 95.262    | 95.058 | 3.946       | 3.910 |

|  |                   |    |        |        |       |       |       |       |        |        |       |       |
|--|-------------------|----|--------|--------|-------|-------|-------|-------|--------|--------|-------|-------|
|  | TaTe <sub>2</sub> | 2H | 14.974 | 15.235 | 9.462 | 9.651 | 2.772 | 2.833 | 81.251 | 81.158 | 3.854 | 3.814 |
|  |                   | 1T | 3.655  | 3.740  | 7.243 | 6.732 | 2.771 | 2.599 | 97.558 | 97.636 | 4.226 | 3.886 |

**Table S5:** Details of the geometry optimization for all the 06 systems are tabulated below for optB88-vdW vdW-DF functional.

| Functional | System            | Phase | a(Å)   |        | c(Å)   |        | A-B (Å) |       | Angle (°) |        | vdW gap (Å) |       |
|------------|-------------------|-------|--------|--------|--------|--------|---------|-------|-----------|--------|-------------|-------|
|            |                   |       | Cal.   | Expt.  | Cal.   | Expt.  | Cal.    | Expt. | Cal.      | Expt.  | Cal.        | Expt. |
| optB88-vdW | NbS <sub>2</sub>  | 2H    | 3.358  | 3.368  | 12.054 | 12.624 | 2.497   | 2.495 | 78.169    | 77.575 | 3.470       | 3.732 |
|            |                   | 1T    | 3.386  | 3.403  | 5.939  | 6.202  | 2.498   | 2.489 | 94.678    | 93.767 | 3.438       | 3.707 |
|            | NbSe <sub>2</sub> | 2H    | 3.486  | 3.499  | 12.732 | 13.413 | 2.628   | 2.622 | 80.043    | 79.201 | 3.597       | 3.924 |
|            |                   | 1T    | 3.505  | 3.518  | 6.306  | 6.528  | 2.628   | 2.614 | 96.360    | 95.431 | 3.578       | 3.820 |
|            | NbTe <sub>2</sub> | 2H    | 14.961 | 15.067 | 9.556  | 9.607  | 2.856   | 2.841 | 80.884    | 81.262 | 3.625       | 3.732 |
|            |                   | 1T    | 3.720  | 3.720  | 6.874  | 7.148  | 2.824   | 2.814 | 97.607    | 97.247 | 3.860       | 4.116 |
|            | TaS <sub>2</sub>  | 2H    | 3.339  | 3.320  | 12.175 | 12.300 | 2.485   | 2.488 | 78.272    | 79.234 | 3.525       | 3.540 |
|            |                   | 1T    | 3.376  | 3.360  | 5.964  | 5.900  | 2.483   | 2.436 | 94.374    | 92.837 | 3.482       | 3.530 |
|            | TaSe <sub>2</sub> | 2H    | 3.471  | 3.476  | 12.856 | 13.418 | 2.615   | 2.607 | 79.991    | 79.354 | 3.661       | 3.930 |
|            |                   | 1T    | 3.501  | 3.509  | 6.327  | 6.599  | 2.614   | 2.599 | 95.903    | 95.058 | 3.628       | 3.910 |
|            | TaTe <sub>2</sub> | 2H    | 14.953 | 15.235 | 9.538  | 9.651  | 2.846   | 2.833 | 80.335    | 81.158 | 3.750       | 3.814 |
|            |                   | 1T    | 3.720  | 3.740  | 6.917  | 6.732  | 2.809   | 2.599 | 97.154    | 97.636 | 3.938       | 3.886 |

**Table S6:** Details of the geometry optimization for all the 06 systems are tabulated below for optPBE-vdW vdW-DF functional.

| Functional | System            | Phase | a(Å)   |        | c(Å)   |        | A-B (Å) |       | Angle (°) |        | vdW gap (Å) |       |
|------------|-------------------|-------|--------|--------|--------|--------|---------|-------|-----------|--------|-------------|-------|
|            |                   |       | Cal.   | Expt.  | Cal.   | Expt.  | Cal.    | Expt. | Cal.      | Expt.  | Cal.        | Expt. |
| optPBE-vdW | NbS <sub>2</sub>  | 2H    | 3.371  | 3.368  | 12.352 | 12.624 | 2.504   | 2.495 | 77.986    | 77.575 | 3.597       | 3.732 |
|            |                   | 1T    | 3.398  | 3.403  | 6.072  | 6.202  | 2.505   | 2.489 | 94.592    | 93.767 | 3.548       | 3.707 |
|            | NbSe <sub>2</sub> | 2H    | 3.500  | 3.499  | 13.009 | 13.413 | 2.636   | 2.622 | 79.880    | 79.201 | 3.717       | 3.924 |
|            |                   | 1T    | 3.519  | 3.518  | 6.456  | 6.528  | 2.636   | 2.614 | 96.240    | 95.431 | 3.703       | 3.820 |
|            | NbTe <sub>2</sub> | 2H    | 15.171 | 15.067 | 9.650  | 9.607  | 2.703   | 2.841 | 81.664    | 81.262 | 3.823       | 3.732 |
|            |                   | 1T    | 3.727  | 3.720  | 7.059  | 7.148  | 2.832   | 2.814 | 97.722    | 97.247 | 4.002       | 4.116 |
|            | TaS <sub>2</sub>  | 2H    | 3.350  | 3.320  | 12.456 | 12.300 | 2.491   | 2.488 | 78.150    | 79.234 | 3.646       | 3.540 |
|            |                   | 1T    | 3.389  | 3.360  | 6.105  | 5.900  | 2.489   | 2.436 | 94.226    | 92.837 | 3.603       | 3.530 |
|            | TaSe <sub>2</sub> | 2H    | 3.483  | 3.476  | 13.141 | 13.418 | 2.623   | 2.607 | 79.893    | 79.354 | 3.777       | 3.930 |
|            |                   | 1T    | 3.514  | 3.509  | 6.478  | 6.599  | 2.621   | 2.599 | 95.799    | 95.058 | 3.755       | 3.910 |
|            | TaTe <sub>2</sub> | 2H    | 15.192 | 15.235 | 9.641  | 9.651  | 2.856   | 2.833 | 81.412    | 81.158 | 3.840       | 3.814 |
|            |                   | 1T    | 3.729  | 3.740  | 7.074  | 6.732  | 2.818   | 2.599 | 97.195    | 97.636 | 4.065       | 3.886 |

**Table S7:** Details of the geometry optimization for all the 06 systems are tabulated below for vdW-DF2 vdW-DF functional.

| Functional | System            | Phase | a(Å)   |        | c(Å)   |        | A-B (Å) |       | Angle (°) |        | vdW gap (Å) |       |
|------------|-------------------|-------|--------|--------|--------|--------|---------|-------|-----------|--------|-------------|-------|
|            |                   |       | Cal.   | Expt.  | Cal.   | Expt.  | Cal.    | Expt. | Cal.      | Expt.  | Cal.        | Expt. |
| vdW-DF2    | NbS <sub>2</sub>  | 2H    | 3.454  | 3.368  | 12.548 | 12.624 | 2.546   | 2.495 | 76.920    | 77.575 | 3.684       | 3.732 |
|            |                   | 1T    | 3.510  | 3.403  | 6.135  | 6.202  | 2.546   | 2.489 | 92.875    | 93.767 | 3.662       | 3.707 |
|            | NbSe <sub>2</sub> | 2H    | 3.604  | 3.499  | 13.362 | 13.413 | 2.690   | 2.622 | 78.670    | 79.201 | 3.870       | 3.924 |
|            |                   | 1T    | 3.644  | 3.518  | 6.556  | 6.528  | 2.689   | 2.614 | 94.675    | 95.431 | 3.836       | 3.820 |
|            | NbTe <sub>2</sub> | 2H    | 14.861 | 15.067 | 9.464  | 9.607  | 2.845   | 2.841 | 81.722    | 81.262 | 3.670       | 3.732 |
|            |                   | 1T    | 3.880  | 3.720  | 7.205  | 7.148  | 2.891   | 2.814 | 95.421    | 97.247 | 4.184       | 4.116 |
|            | TaS <sub>2</sub>  | 2H    | 3.426  | 3.320  | 12.632 | 12.300 | 2.530   | 2.488 | 77.168    | 79.234 | 3.725       | 3.540 |
|            |                   | 1T    | 3.487  | 3.360  | 6.163  | 5.900  | 2.528   | 2.436 | 92.786    | 92.837 | 3.701       | 3.530 |

|  |                   |    |        |        |        |        |       |       |        |        |       |       |
|--|-------------------|----|--------|--------|--------|--------|-------|-------|--------|--------|-------|-------|
|  | TaSe <sub>2</sub> | 2H | 3.580  | 3.476  | 13.443 | 13.418 | 2.674 | 2.607 | 78.789 | 79.354 | 3.917 | 3.930 |
|  |                   | 1T | 3.637  | 3.509  | 6.562  | 6.599  | 2.672 | 2.599 | 94.329 | 95.058 | 3.876 | 3.910 |
|  | TaTe <sub>2</sub> | 2H | 15.617 | 15.235 | 9.970  | 9.651  | 2.742 | 2.833 | 81.321 | 81.158 | 4.003 | 3.814 |
|  |                   | 1T | 3.888  | 3.740  | 7.217  | 6.732  | 2.688 | 2.599 | 98.002 | 97.636 | 3.789 | 3.886 |

**Table S8:** Details of the geometry optimization for all the 06 systems are tabulated below for rev-vdW-DF2 vdW-DF functional.

| Functional  | System            | Phase | a(Å)   |        | c(Å)   |        | A-B (Å) |       | Angle (°) |        | vdW gap (Å) |       |
|-------------|-------------------|-------|--------|--------|--------|--------|---------|-------|-----------|--------|-------------|-------|
|             |                   |       | Cal.   | Expt.  | Cal.   | Expt.  | Cal.    | Expt. | Cal.      | Expt.  | Cal.        | Expt. |
| rev-vdW-DF2 | NbS <sub>2</sub>  | 2H    | 3.333  | 3.368  | 11.884 | 12.624 | 2.487   | 2.495 | 78.615    | 77.575 | 3.392       | 3.732 |
|             |                   | 1T    | 3.356  | 3.403  | 5.866  | 6.202  | 2.488   | 2.489 | 95.173    | 93.767 | 3.359       | 3.707 |
|             | NbSe <sub>2</sub> | 2H    | 3.457  | 3.499  | 12.512 | 13.413 | 2.615   | 2.622 | 80.501    | 79.201 | 3.502       | 3.924 |
|             |                   | 1T    | 3.470  | 3.518  | 6.225  | 6.528  | 2.616   | 2.614 | 96.913    | 95.431 | 3.491       | 3.820 |
|             | NbTe <sub>2</sub> | 2H    | 14.861 | 15.067 | 9.464  | 9.607  | 2.844   | 2.841 | 81.728    | 81.262 | 3.670       | 3.732 |
|             |                   | 1T    | 3.681  | 3.720  | 6.766  | 7.148  | 2.809   | 2.814 | 98.118    | 97.247 | 3.752       | 4.116 |
|             | TaS <sub>2</sub>  | 2H    | 3.315  | 3.320  | 12.018 | 12.300 | 2.475   | 2.488 | 78.719    | 79.234 | 3.450       | 3.540 |
|             |                   | 1T    | 3.347  | 3.360  | 5.901  | 5.900  | 2.473   | 2.436 | 94.849    | 92.837 | 3.411       | 3.530 |
|             | TaSe <sub>2</sub> | 2H    | 3.441  | 3.476  | 12.661 | 13.418 | 2.601   | 2.607 | 80.378    | 79.354 | 3.576       | 3.930 |
|             |                   | 1T    | 3.467  | 3.509  | 6.257  | 6.599  | 2.602   | 2.599 | 96.471    | 95.058 | 3.549       | 3.910 |
|             | TaTe <sub>2</sub> | 2H    | 14.793 | 15.235 | 9.435  | 9.651  | 2.834   | 2.833 | 81.008    | 81.158 | 3.562       | 3.814 |
|             |                   | 1T    | 3.677  | 3.740  | 6.845  | 6.732  | 2.799   | 2.599 | 97.825    | 97.636 | 3.849       | 3.886 |

**Table S9:** Details of the geometry optimization for all the 06 systems are tabulated below for SCAN+rVV10 vdW-DF functional.

| Functional | System            | Phase | a(Å)   |        | c(Å)   |        | A-B (Å) |       | Angle (°) |        | vdW gap (Å) |       |
|------------|-------------------|-------|--------|--------|--------|--------|---------|-------|-----------|--------|-------------|-------|
|            |                   |       | Cal.   | Expt.  | Cal.   | Expt.  | Cal.    | Expt. | Cal.      | Expt.  | Cal.        | Expt. |
| SCAN+rVV10 | NbS <sub>2</sub>  | 2H    | 3.348  | 3.368  | 11.945 | 12.624 | 2.481   | 2.495 | 77.663    | 77.575 | 3.452       | 3.732 |
|            |                   | 1T    | 3.361  | 3.403  | 6.070  | 6.202  | 2.490   | 2.489 | 95.117    | 93.767 | 3.529       | 3.707 |
|            | NbSe <sub>2</sub> | 2H    | 3.463  | 3.499  | 12.592 | 13.413 | 2.606   | 2.622 | 79.810    | 79.201 | 3.565       | 3.924 |
|            |                   | 1T    | 3.486  | 3.518  | 6.295  | 6.528  | 2.608   | 2.614 | 96.149    | 95.431 | 3.593       | 3.820 |
|            | NbTe <sub>2</sub> | 2H    | 15.067 | 15.067 | 9.607  | 9.607  | 2.842   | 2.841 | 81.728    | 81.262 | 3.835       | 3.732 |
|            |                   | 1T    | 3.649  | 3.720  | 6.893  | 7.148  | 2.792   | 2.814 | 98.411    | 97.247 | 3.854       | 4.116 |
|            | TaS <sub>2</sub>  | 2H    | 3.311  | 3.320  | 12.095 | 12.300 | 2.461   | 2.488 | 78.071    | 79.234 | 3.513       | 3.540 |
|            |                   | 1T    | 3.348  | 3.360  | 5.960  | 5.900  | 2.458   | 2.436 | 94.174    | 92.837 | 3.503       | 3.530 |
|            | TaSe <sub>2</sub> | 2H    | 3.430  | 3.476  | 12.606 | 13.418 | 2.584   | 2.607 | 79.914    | 79.354 | 3.583       | 3.930 |
|            |                   | 1T    | 3.461  | 3.509  | 6.299  | 6.599  | 2.581   | 2.599 | 95.814    | 95.058 | 3.630       | 3.910 |
|            | TaTe <sub>2</sub> | 2H    | 15.067 | 15.235 | 9.578  | 9.651  | 2.843   | 2.833 | 81.003    | 81.158 | 3.859       | 3.814 |
|            |                   | 1T    | 3.635  | 3.740  | 6.904  | 6.732  | 2.774   | 2.599 | 97.954    | 97.636 | 3.901       | 3.886 |

**Table S10:** Details of the energy values and the 1T-2H difference for all the 06 systems for 09 XC functional (04 functional+05 vdW-DFs).

| Functional | Serial | System            | 1T (eV/atom) | 2H (eV/atom) | 1T-2H (eV/atom) |
|------------|--------|-------------------|--------------|--------------|-----------------|
| LDA        | I      | NbS <sub>2</sub>  | -7.9093      | -7.9451      | 0.0358          |
|            |        | NbSe <sub>2</sub> | -7.3420      | -7.3750      | 0.0330          |
|            |        | NbTe <sub>2</sub> | -6.7006      | -6.7463      | 0.0457          |
|            | II     | TaS <sub>2</sub>  | -8.5216      | -8.5450      | 0.0234          |
|            |        | TaSe <sub>2</sub> | -7.8872      | -7.9107      | 0.0235          |

|             |            |                   |                   |          |          |        |
|-------------|------------|-------------------|-------------------|----------|----------|--------|
| PBE         | I          | TaTe <sub>2</sub> | -7.1591           | -7.2150  | 0.0559   |        |
|             |            | NbS <sub>2</sub>  | -7.1010           | -7.1355  | 0.0345   |        |
|             |            | NbSe <sub>2</sub> | -6.5158           | -6.5466  | 0.0308   |        |
|             | II         | NbTe <sub>2</sub> | -5.8838           | -5.9206  | 0.0368   |        |
|             |            | TaS <sub>2</sub>  | -7.7320           | -7.7537  | 0.0217   |        |
|             |            | TaSe <sub>2</sub> | -7.0778           | -7.1000  | 0.0222   |        |
|             | PBESol     | I                 | TaTe <sub>2</sub> | -6.3604  | -6.4013  | 0.0409 |
|             |            |                   | NbS <sub>2</sub>  | -7.5761  | -7.6120  | 0.0359 |
|             |            |                   | NbSe <sub>2</sub> | -7.0159  | -7.0482  | 0.0323 |
| II          |            | NbTe <sub>2</sub> | -6.3976           | -6.4431  | 0.0455   |        |
|             |            | TaS <sub>2</sub>  | -8.2058           | -8.2298  | 0.0240   |        |
|             |            | TaSe <sub>2</sub> | -7.5774           | -7.6003  | 0.0229   |        |
| SCAN        | I          | TaTe <sub>2</sub> | -6.8728           | -6.3965  | -0.4763  |        |
|             |            | NbS <sub>2</sub>  | -18.5616          | -18.5951 | 0.0335   |        |
|             |            | NbSe <sub>2</sub> | -25.3056          | -25.3389 | 0.0333   |        |
|             | II         | NbTe <sub>2</sub> | -36.3233          | -36.3661 | 0.0428   |        |
|             |            | TaS <sub>2</sub>  | -29.7512          | -29.7739 | 0.0227   |        |
|             |            | TaSe <sub>2</sub> | -36.4291          | -36.4575 | 0.0284   |        |
|             | optB88-vdW | I                 | TaTe <sub>2</sub> | -47.3592 | -47.4125 | 0.0533 |
|             |            |                   | NbS <sub>2</sub>  | -5.2066  | -5.2365  | 0.0299 |
|             |            |                   | NbSe <sub>2</sub> | -4.5201  | -4.5466  | 0.0265 |
| II          |            | NbTe <sub>2</sub> | -3.6728           | -3.7087  | 0.0359   |        |
|             |            | TaS <sub>2</sub>  | -5.9236           | -5.9401  | 0.0165   |        |
|             |            | TaSe <sub>2</sub> | -5.1703           | -5.1879  | 0.0176   |        |
| optPBE-vdW  | I          | TaTe <sub>2</sub> | -4.2432           | -4.2843  | 0.0411   |        |
|             |            | NbS <sub>2</sub>  | -5.0613           | -5.0904  | 0.0291   |        |
|             |            | NbSe <sub>2</sub> | -4.3643           | -4.3916  | 0.0273   |        |
|             | II         | NbTe <sub>2</sub> | -3.5169           | -3.5519  | 0.0350   |        |
|             |            | TaS <sub>2</sub>  | -5.7871           | -5.8043  | 0.0172   |        |
|             |            | TaSe <sub>2</sub> | -5.0243           | -5.0428  | 0.0185   |        |
| vdW-DF2     | I          | TaTe <sub>2</sub> | -4.0969           | -4.1363  | 0.0394   |        |
|             |            | NbS <sub>2</sub>  | -4.7365           | -4.7513  | 0.0148   |        |
|             |            | NbSe <sub>2</sub> | -3.9996           | -4.0176  | 0.0180   |        |
|             | II         | NbTe <sub>2</sub> | -3.1393           | -4.0890  | 0.9497   |        |
|             |            | TaS <sub>2</sub>  | -5.4015           | -5.4050  | 0.0035   |        |
|             |            | TaSe <sub>2</sub> | -4.5996           | -4.6077  | 0.0081   |        |
| rev-vdW-DF2 | I          | TaTe <sub>2</sub> | -3.6684           | -3.6943  | 0.0259   |        |
|             |            | NbS <sub>2</sub>  | -5.5384           | -5.5706  | 0.0322   |        |
|             |            | NbSe <sub>2</sub> | -4.8663           | -4.8958  | 0.0295   |        |
|             | II         | NbTe <sub>2</sub> | -4.0477           | -4.0890  | 0.0413   |        |
|             |            | TaS <sub>2</sub>  | -6.2621           | -6.2830  | 0.0209   |        |
|             |            | TaSe <sub>2</sub> | -5.5235           | -5.5445  | 0.0210   |        |
| SCAN+rVV10  | I          | TaTe <sub>2</sub> | -4.6222           | -4.6708  | 0.0558   |        |
|             |            | NbS <sub>2</sub>  | -18.4604          | -18.6592 | 0.1988   |        |
|             |            | NbSe <sub>2</sub> | -25.1990          | -25.2352 | 0.0362   |        |
|             | II         | NbTe <sub>2</sub> | -36.2079          | -36.2526 | 0.0447   |        |
|             |            | TaS <sub>2</sub>  | -29.6609          | -29.6856 | 0.0247   |        |
|             |            | TaSe <sub>2</sub> | -36.3306          | -36.3581 | 0.0275   |        |

|  |  |                   |          |          |        |
|--|--|-------------------|----------|----------|--------|
|  |  | TaTe <sub>2</sub> | -47.2474 | -47.3052 | 0.0578 |
|--|--|-------------------|----------|----------|--------|

**Electronic Band structures:**

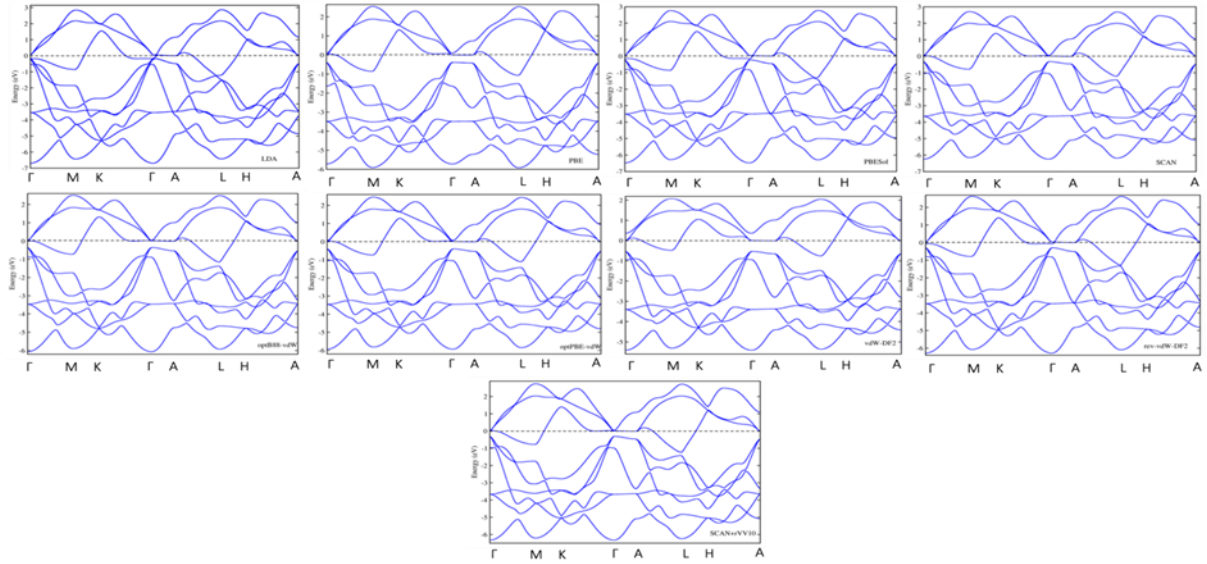

**Figure S1:** Band structures of 1T phase of NbS<sub>2</sub> for all 09 XC functional (top level for LDA, PBE, PBESol, SCAN from left to right; bottom level for optB88-vdW, optPBE-vdW, vdW-DF2, rev-vdW-DF2 and SCAN+rVV10 from left to right).

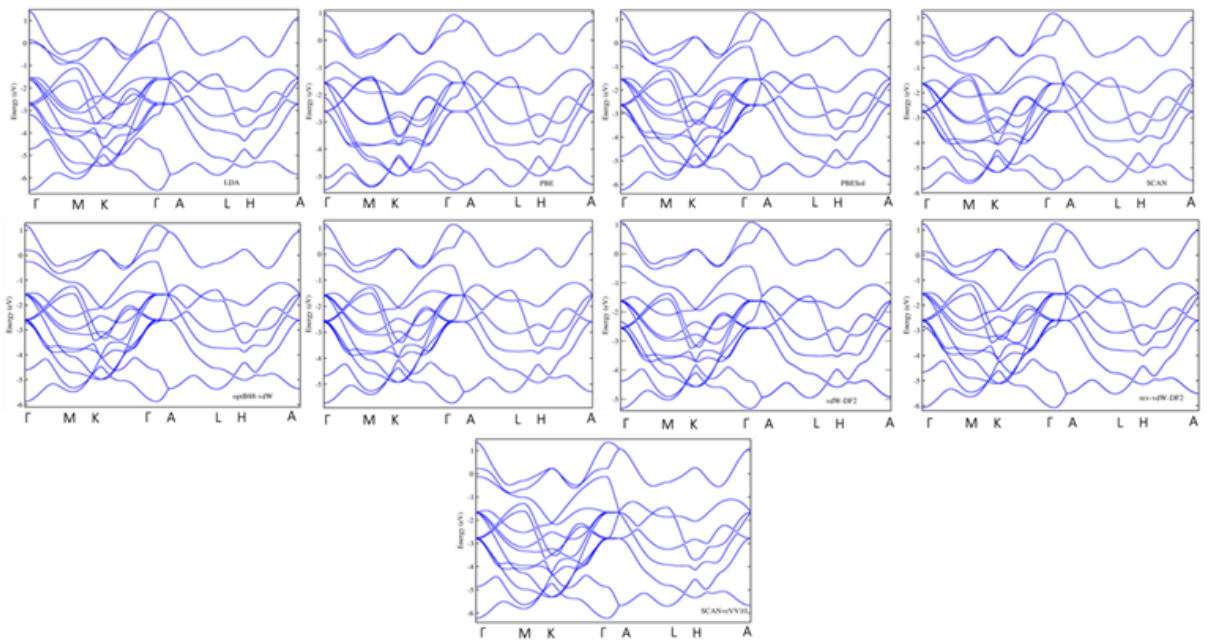

**Figure S2:** Band structures of 2H phase of NbS<sub>2</sub> for all 09 XC functional (top level for LDA, PBE, PBESol, SCAN from left to right; bottom level for optB88-vdW, optPBE-vdW, vdW-DF2, rev-vdW-DF2 and SCAN+rVV10 from left to right).

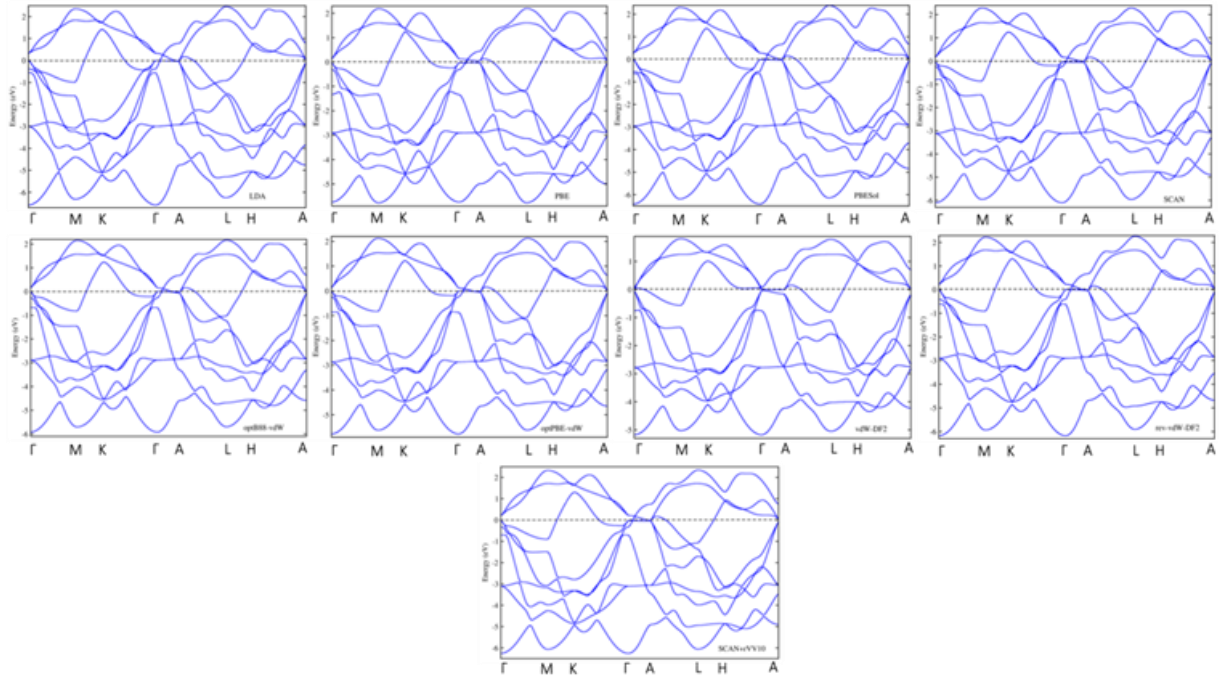

**Figure S3:** Band structures of 1T phase of NbSe<sub>2</sub> for all 09 XC functional (top level for LDA, PBE, PBESol, SCAN from left to right; bottom level for optB88-vdW, optPBE-vdW, vdW-DF2, rev-vdW-DF2 and SCAN+rVV10 from left to right).

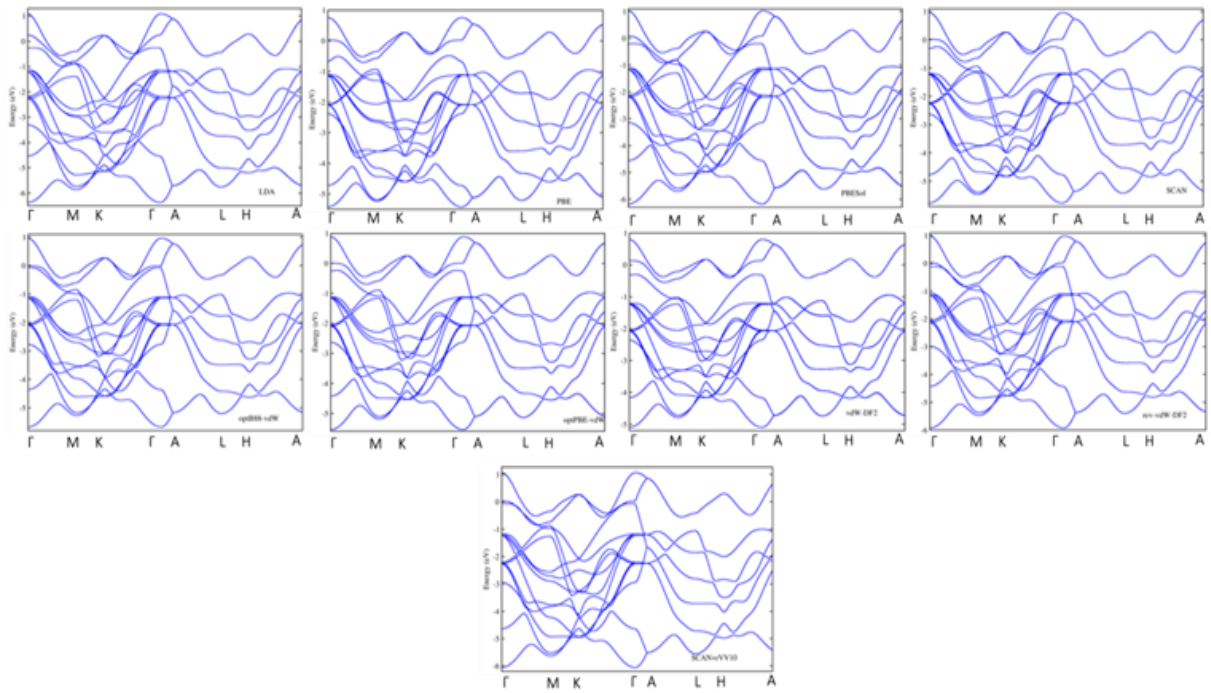

**Figure S4:** Band structures of 2H phase of NbSe<sub>2</sub> for all 09 XC functional (top level for LDA, PBE, PBESol, SCAN from left to right; below column form for optB88-vdW, optPBE-vdW, vdW-DF2, rev-vdW-DF2 and SCAN+rVV10 from top to bottom).

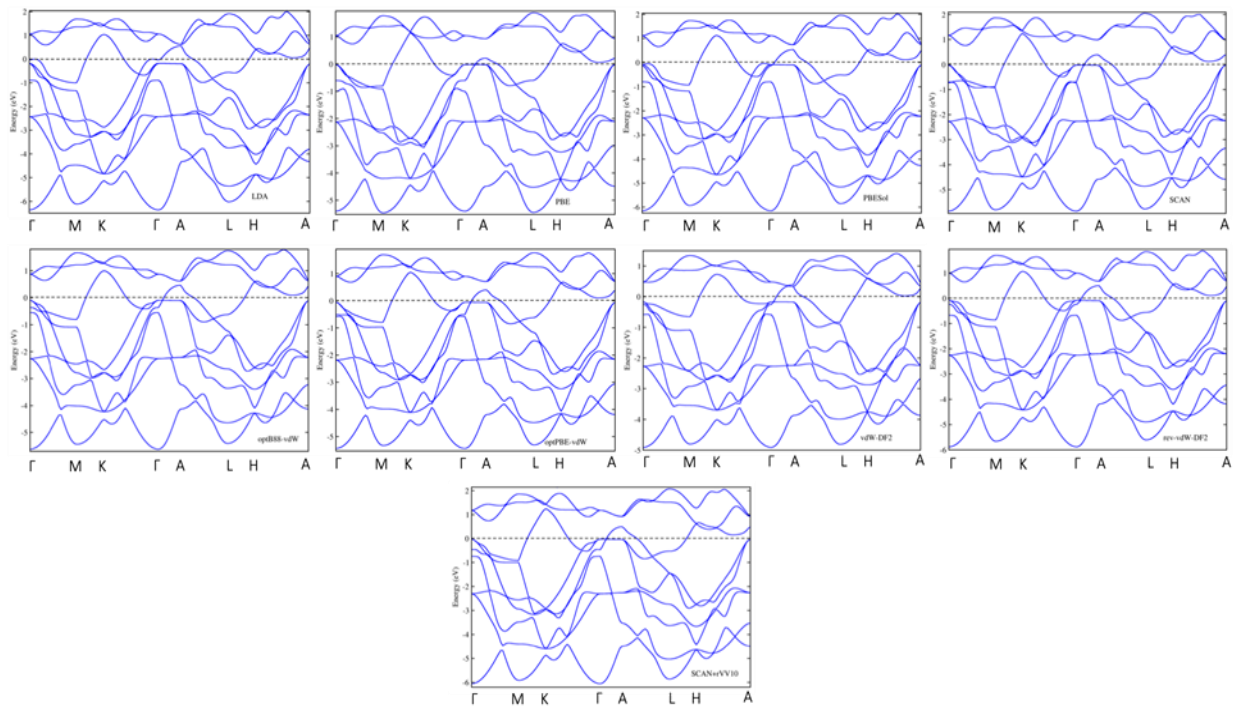

**Figure S5:** Band structures of 1T phase of NbTe<sub>2</sub> for all 09 XC functional (left column for LDA, PBE, PBESol, SCAN from top to bottom; right column for optB88-vdW, optPBE-vdW, vdW-DF2, rev-vdW-DF2 and SCAN+rVV10 from top to bottom).



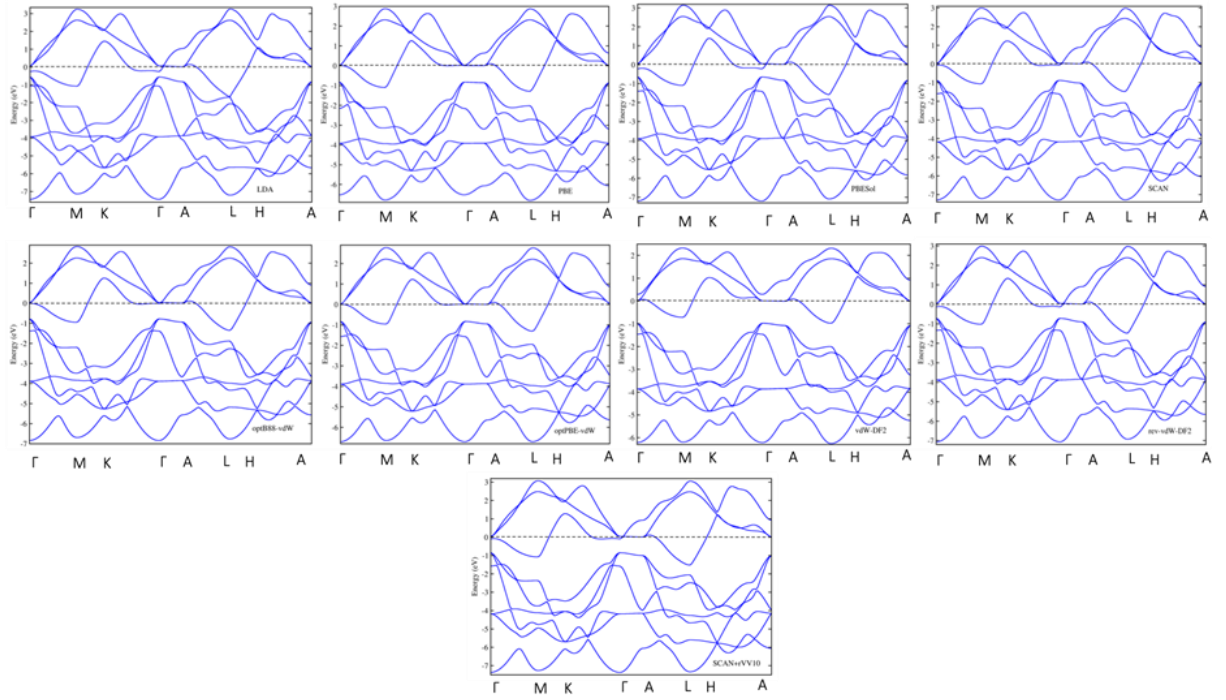

**Figure S6:** Band structures of 1T phase of TaS<sub>2</sub> for all 09 XC functional (left column for LDA, PBE, PBESol, SCAN from top to bottom; right column for optB88-vdW, optPBE-vdW, vdW-DF2, rev-vdW-DF2 and SCAN+rVV10 from top to bottom).

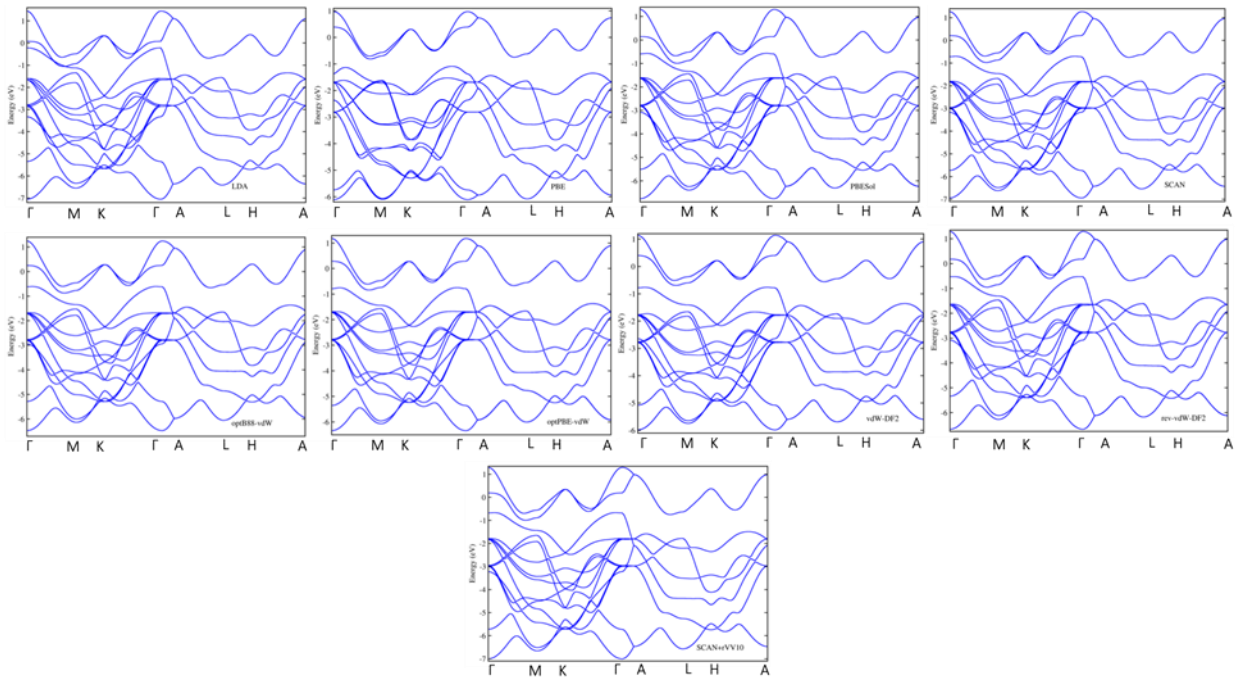

**Figure S7:** Band structures of 2H phase of TaS<sub>2</sub> for all 09 XC functional (left column for LDA, PBE, PBESol, SCAN from top to bottom; right column for optB88-vdW, optPBE-vdW, vdW-DF2, rev-vdW-DF2 and SCAN+rVV10 from top to bottom).

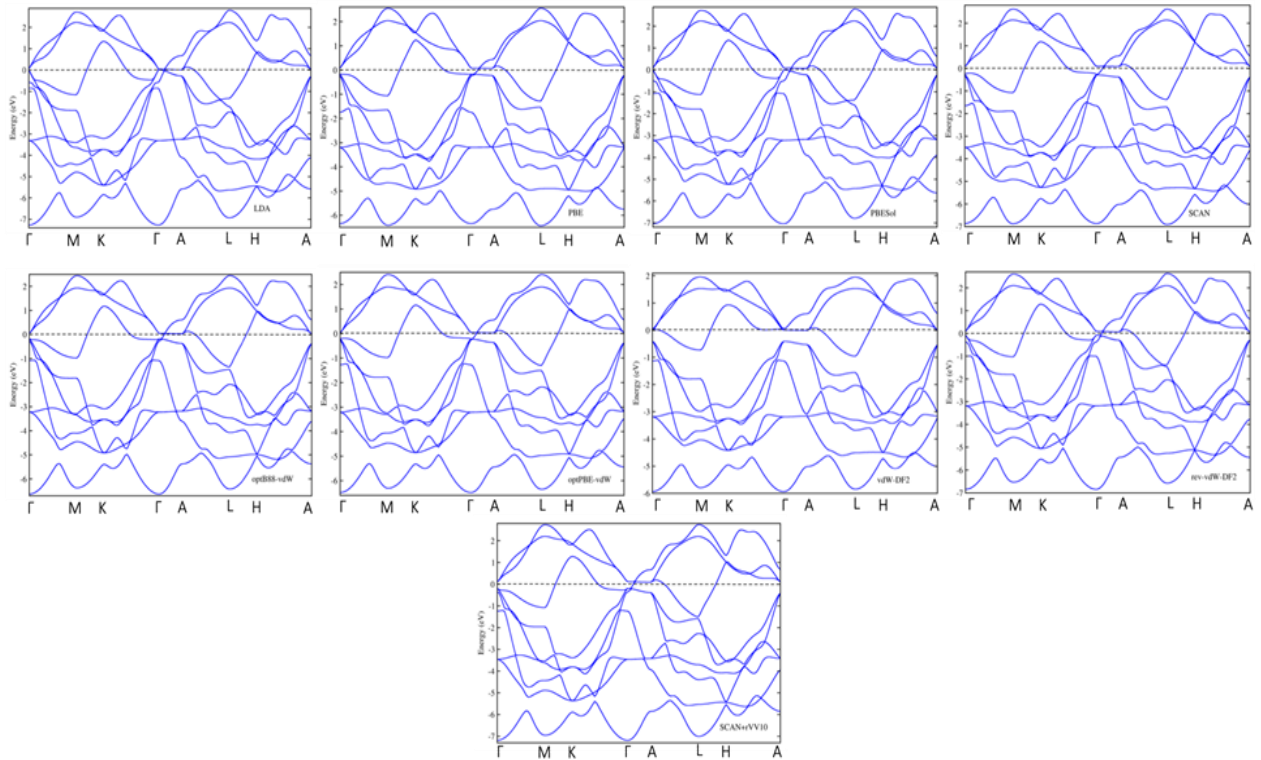

**Figure S8:** Band structures of 1T phase of TaSe<sub>2</sub> for all 09 XC functional (left column for LDA, PBE, PBESol, SCAN from top to bottom; right column for optB88-vdW, optPBE-vdW, vdW-DF2, rev-vdW-DF2 and SCAN+rVV10 from top to bottom).

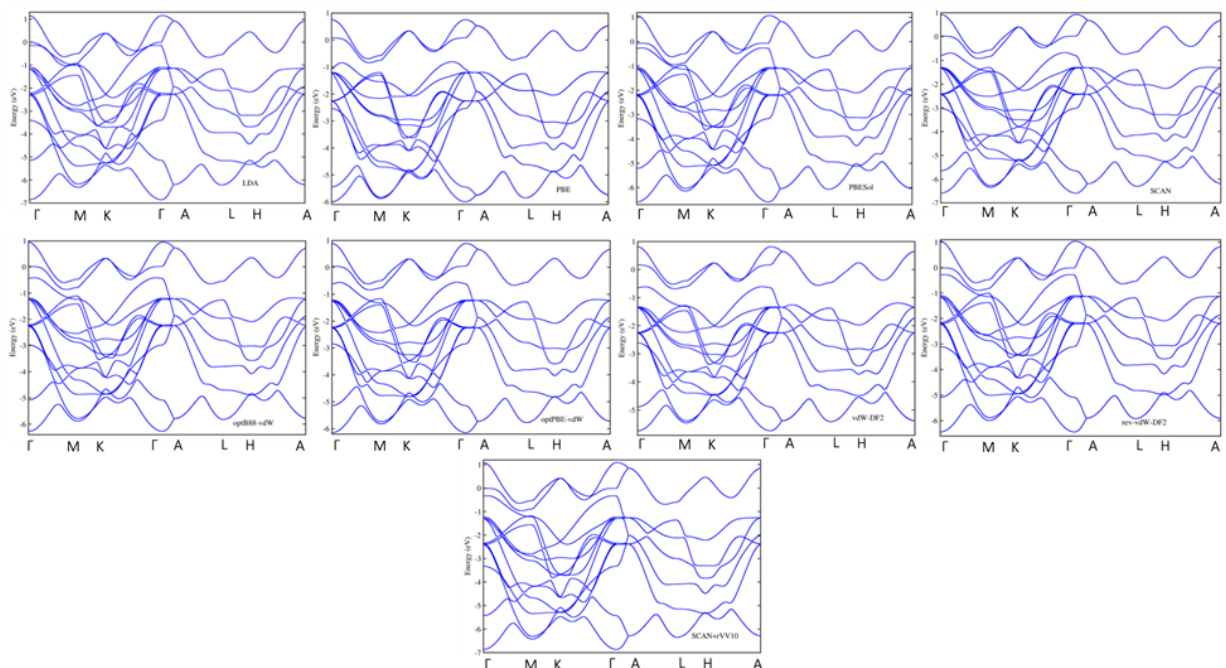

**Figure S9:** Band structures of 2H phase of TaSe<sub>2</sub> for all 09 XC functional (left column for LDA, PBE, PBESol, SCAN from top to bottom; right column for optB88-vdW, optPBE-vdW, vdW-DF2, rev-vdW-DF2 and SCAN+rVV10 from top to bottom).

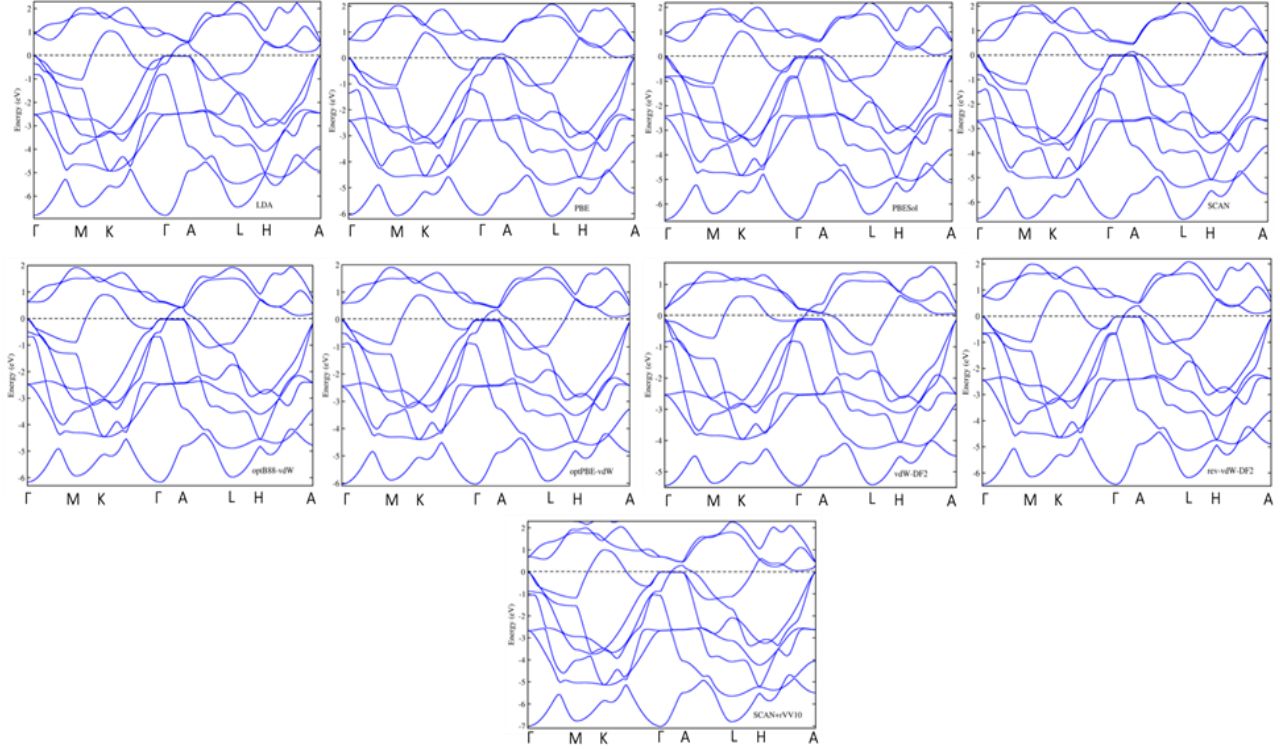

**Figure S10:** Band structures of 1T phase of TaTe<sub>2</sub> for all 09 XC functional (left column for LDA, PBE, PBESol, SCAN from top to bottom; right column for optB88-vdW, optPBE-vdW, vdW-DF2, rev-vdW-DF2 and SCAN+rVV10 from top to bottom).

### Phonon response plot

For the phonon calculations, we consider 2\*2\*3 supercell for the 3 atom unit cells (total 36 atoms) in a few 1T phases of the system. Similarly, 2\*2\*2 supercell has been taken for the 6-atom unit cell (total 48 atoms) and 1\*3\*1 supercell for the 18-atom unit cell (total 54 atoms). In this way, it is obtained 18 displacements for 1T phase and 9 displacements for 2H phase for 3 atom unit cells, giving 36 displacements for both 1T and 2H phases of 6 atom unit cells and 108 displacements for the 2H phase of an 18-atom unit cell. In this way, it is a tedious calculation for phonons, which is still going on for NSOC cases. Some of the phonon plots are shown below

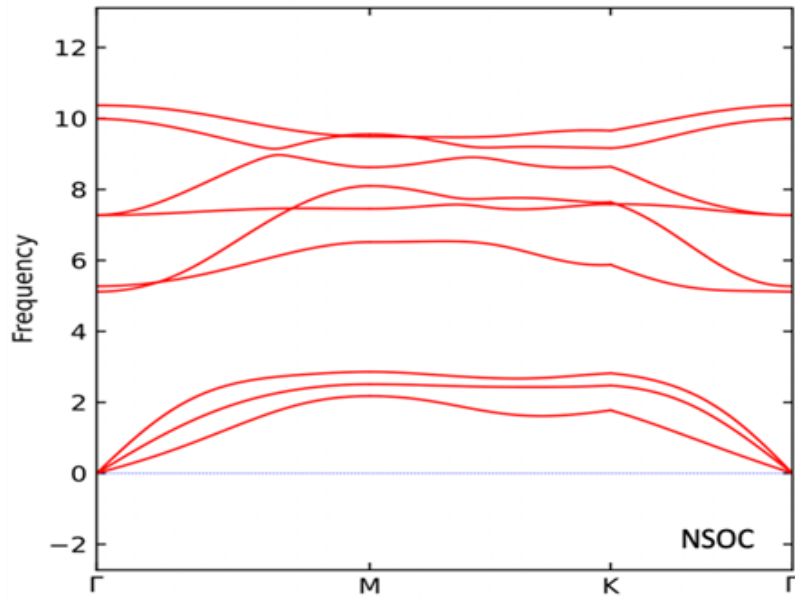

**Figure S11:** Phonon dispersion plot for 1T phase of TaS<sub>2</sub> for vdW-DF2 van der Waals XC functional in absence of SOC.

### Fermi surface plots

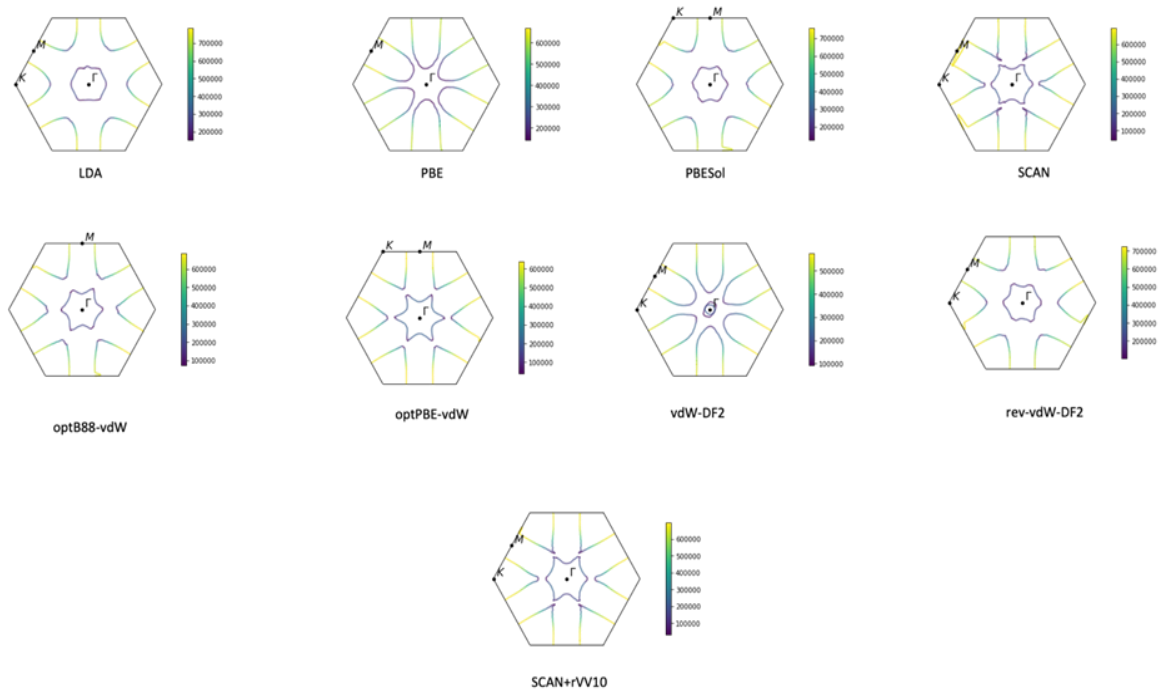

**Figure S12:** Fermi surface plots for 1T phase of NbS<sub>2</sub> all 09 XC functional (top level for LDA, PBE, PBESol, SCAN from left to right; bottom level for optB88-vdW, optPBE-vdW, vdW-DF2, rev-vdW-DF2 and SCAN+rVV10 from left to right) in absence of SOC.

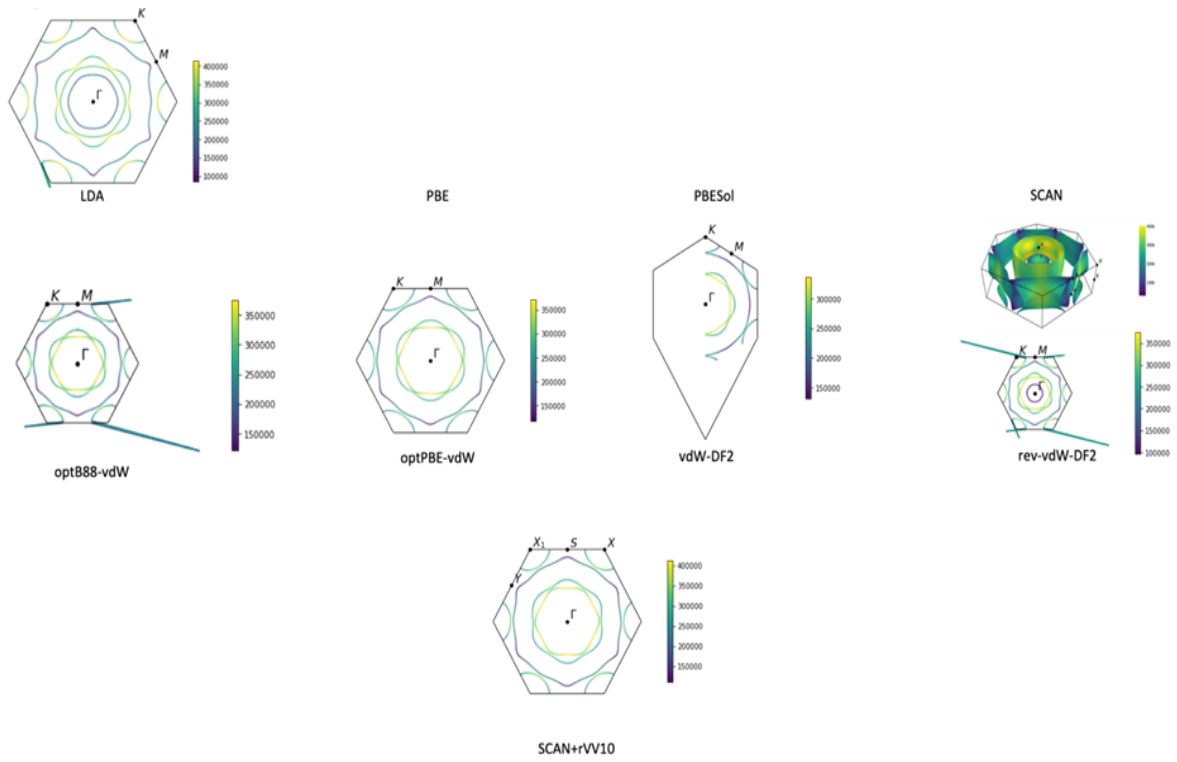

**Figure S13:** Fermi surface plots for 2H phase of NbS<sub>2</sub> all 09 XC functional in absence of SOC.

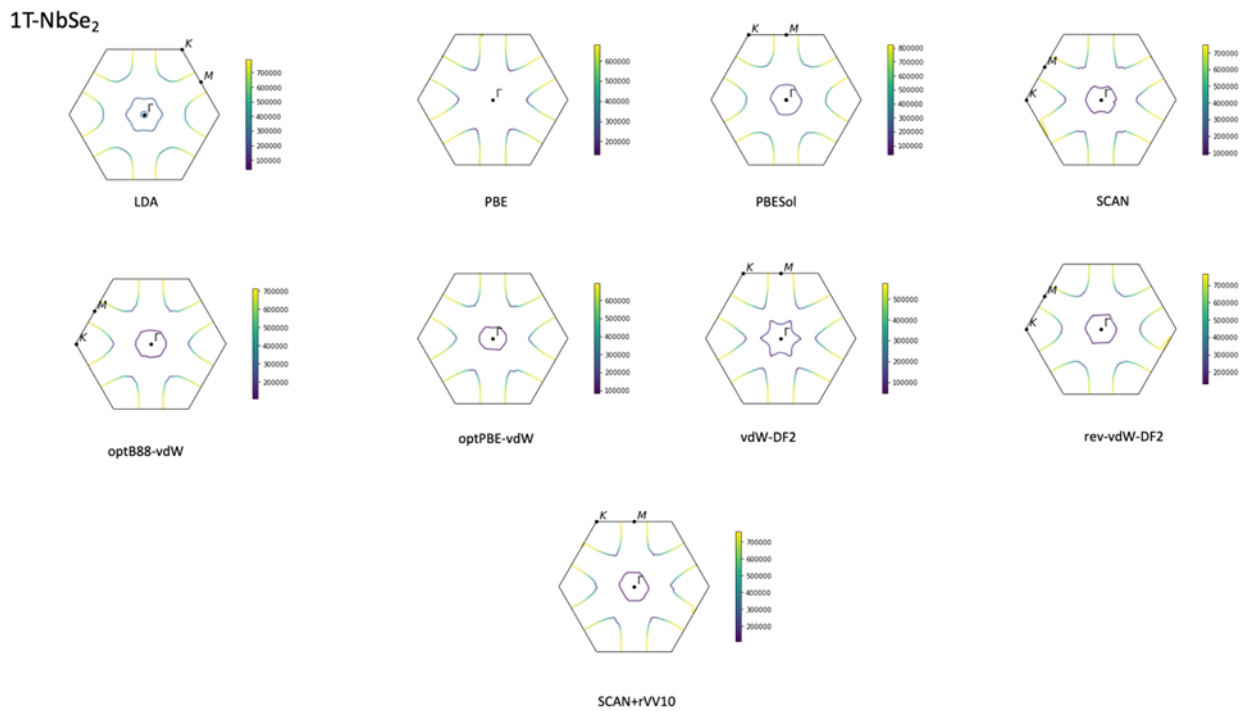

**Figure S14:** Fermi surface plots for 1T phase of NbSe<sub>2</sub> all 09 XC functional (top level for LDA, PBE, PBESol, SCAN from left to right; bottom level for optB88-vdW, optPBE-vdW, vdW-DF2, rev-vdW-DF2 and SCAN+rVV10 from left to right) in absence of SOC.

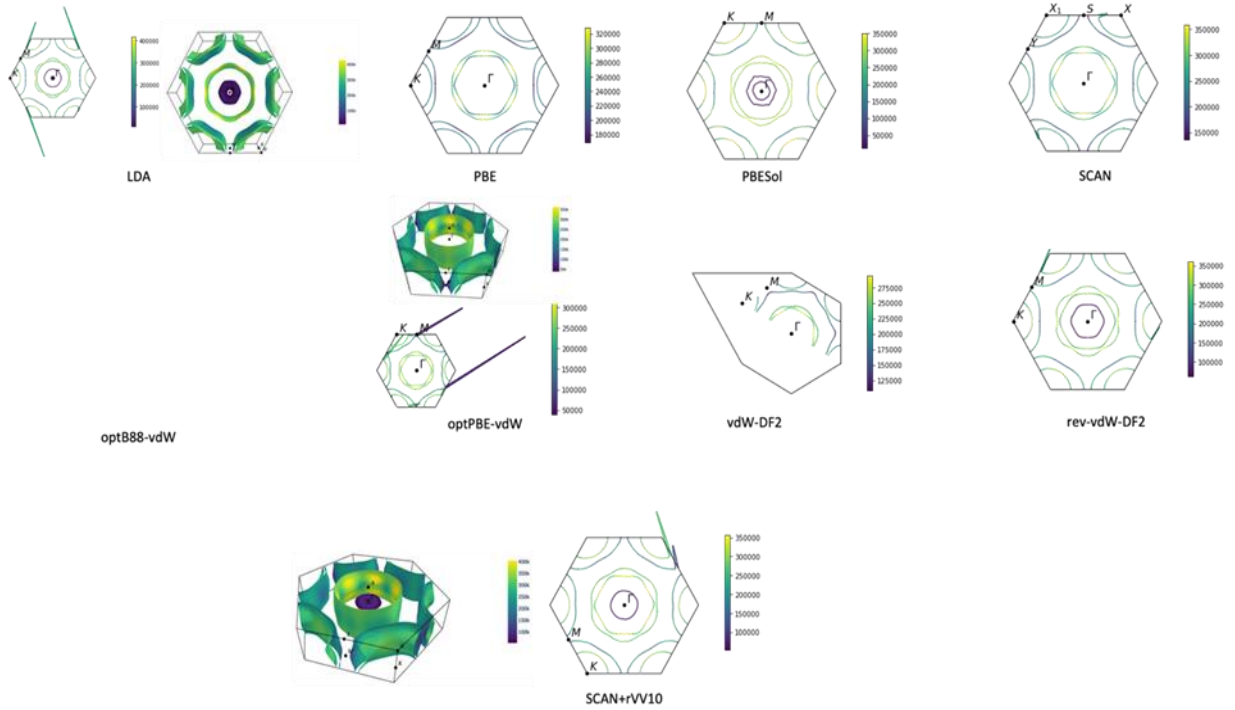

**Figure S15:** Fermi surface plots for 2H phase of NbSe<sub>2</sub> all 09 XC functional in absence of SOC.

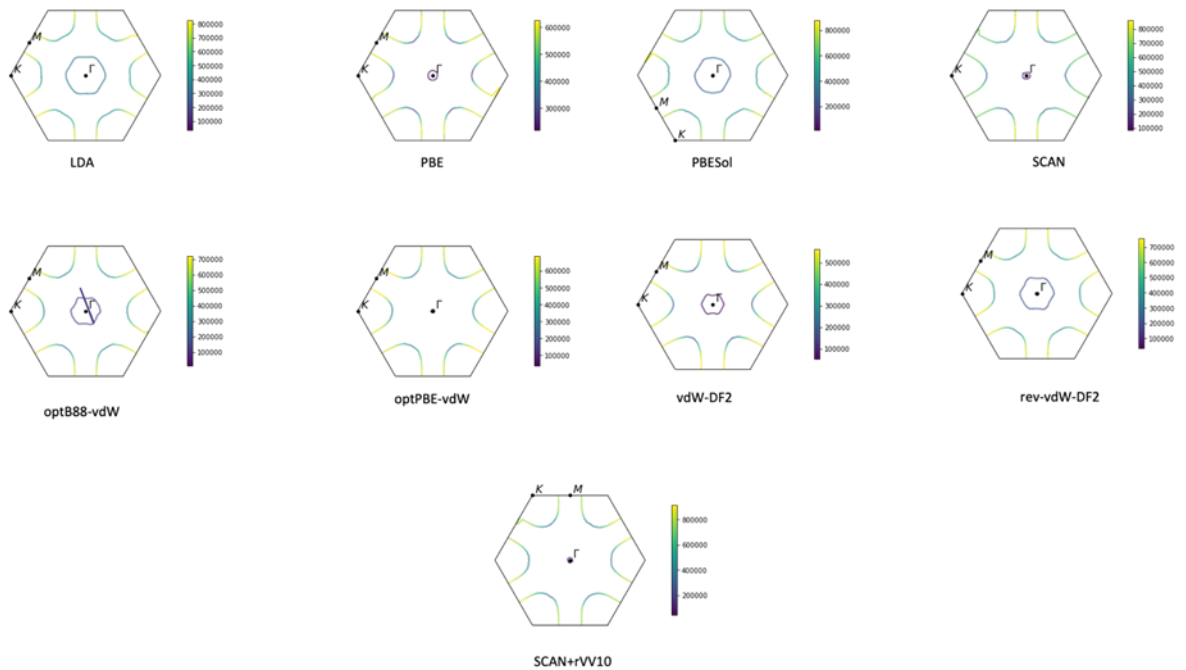

**Figure S16:** Fermi surface plots for 1T phase of NbTe<sub>2</sub> all 09 XC functional (top level for LDA, PBE, PBESol, SCAN from left to right; bottom level for optB88-vdW, optPBE-vdW, vdW-DF2, rev-vdW-DF2 and SCAN+rVV10 from left to right) in absence of SOC.

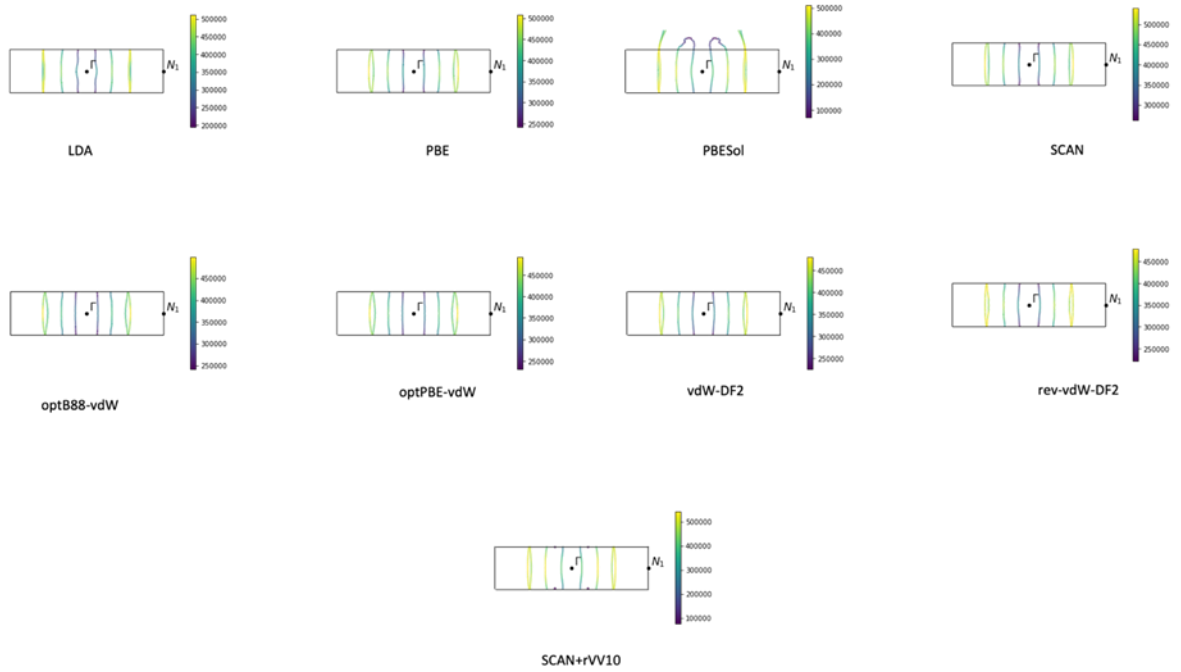

**Figure S17:** Fermi surface plots for 2H phase of NbTe<sub>2</sub> all 09 XC functional (top level for LDA, PBE, PBESol, SCAN from left to right; bottom level for optB88-vdW, optPBE-vdW, vdW-DF2, rev-vdW-DF2 and SCAN+rVV10 from left to right) in absence of SOC.

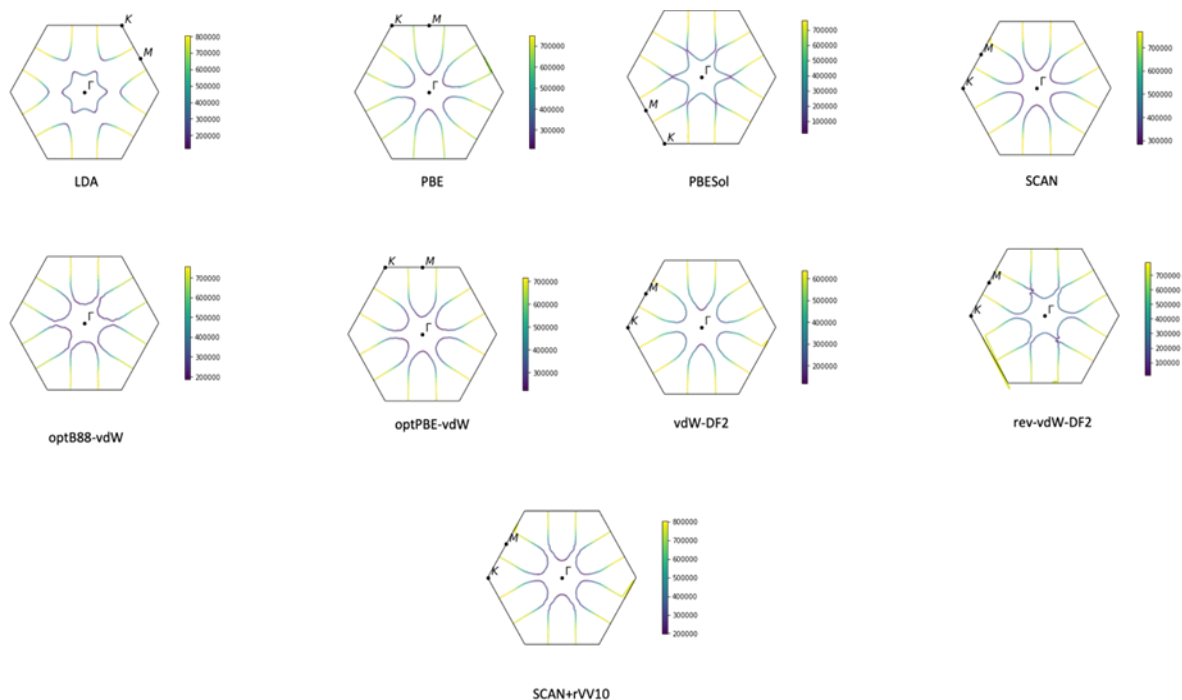

**Figure S18:** Fermi surface plots for 1T phase of TaS<sub>2</sub> all 09 XC functional (top level for LDA, PBE, PBESol, SCAN from left to right; bottom level for optB88-vdW, optPBE-vdW, vdW-DF2, rev-vdW-DF2 and SCAN+rVV10 from left to right) in absence of SOC.

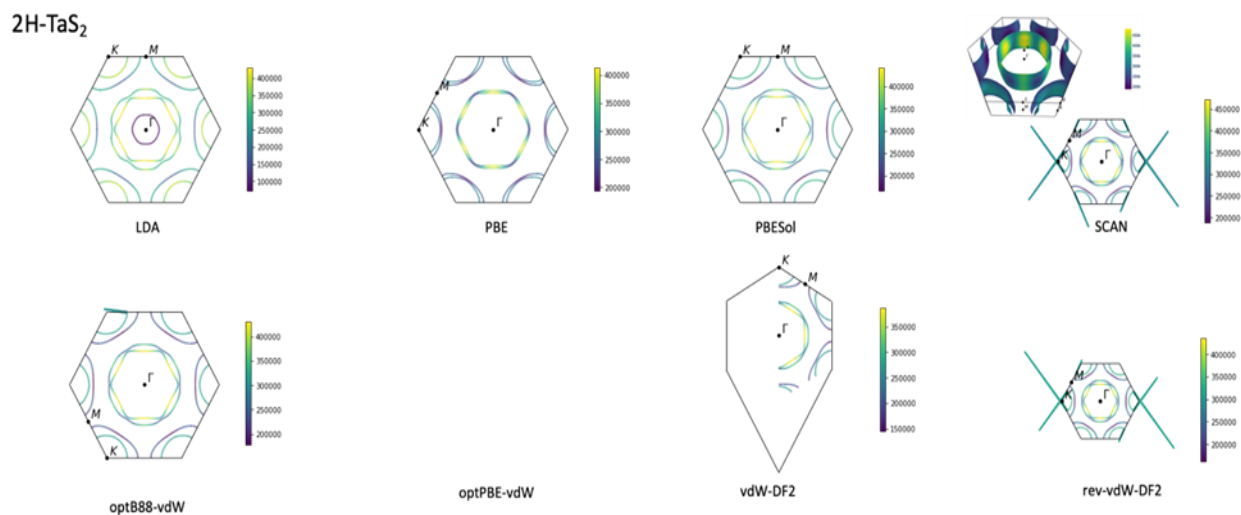

**Figure S19:** Fermi surface plots for 2H phase of TaS<sub>2</sub> all 09 XC functional in absence of SOC.



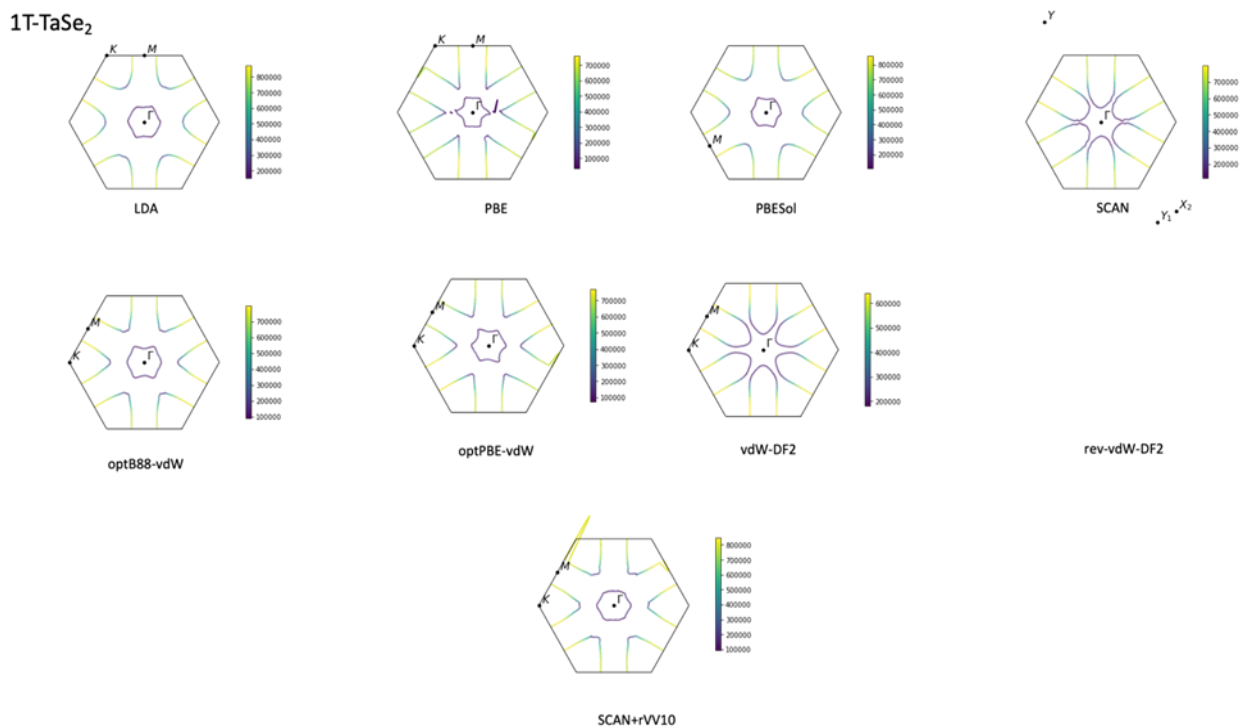

**Figure S20:** Fermi surface plots for 1T phase of TaSe<sub>2</sub> all 09 XC functional (top level for LDA, PBE, PBESol, SCAN from left to right; bottom level for optB88-vdW, optPBE-vdW, vdW-DF2, rev-vdW-DF2 and SCAN+rVV10 from left to right) in absence of SOC.

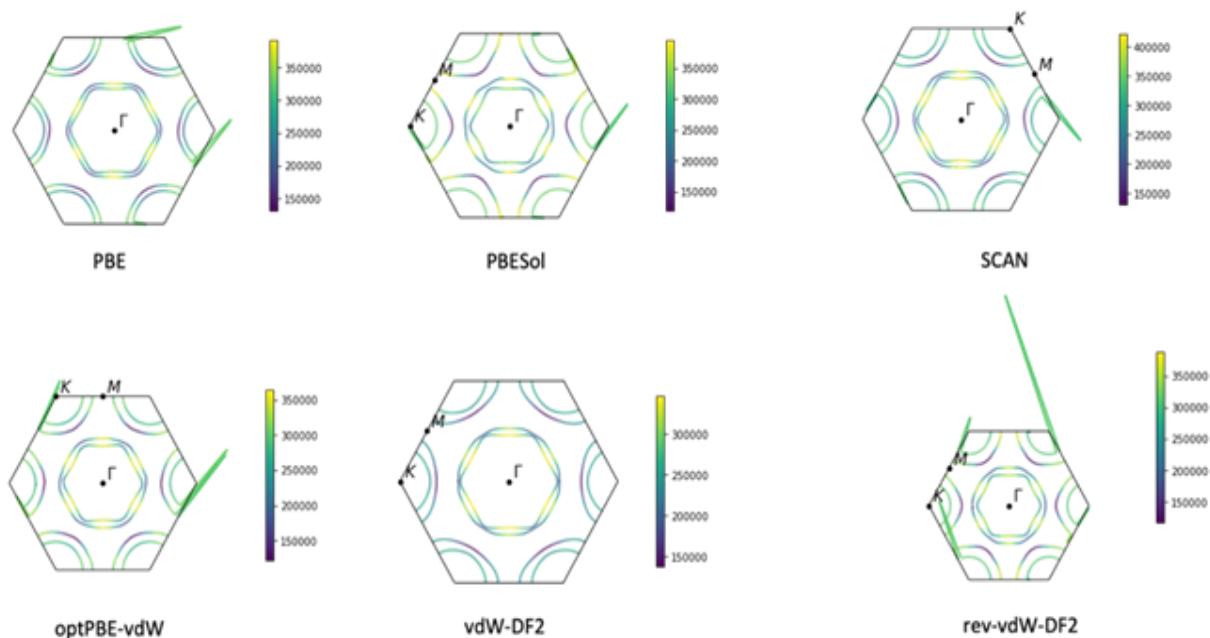

**Figure S21:** Fermi surface plots for 2H phase of TaSe<sub>2</sub> all 09 XC functional in absence of SOC.

### 1T-TaTe<sub>2</sub>

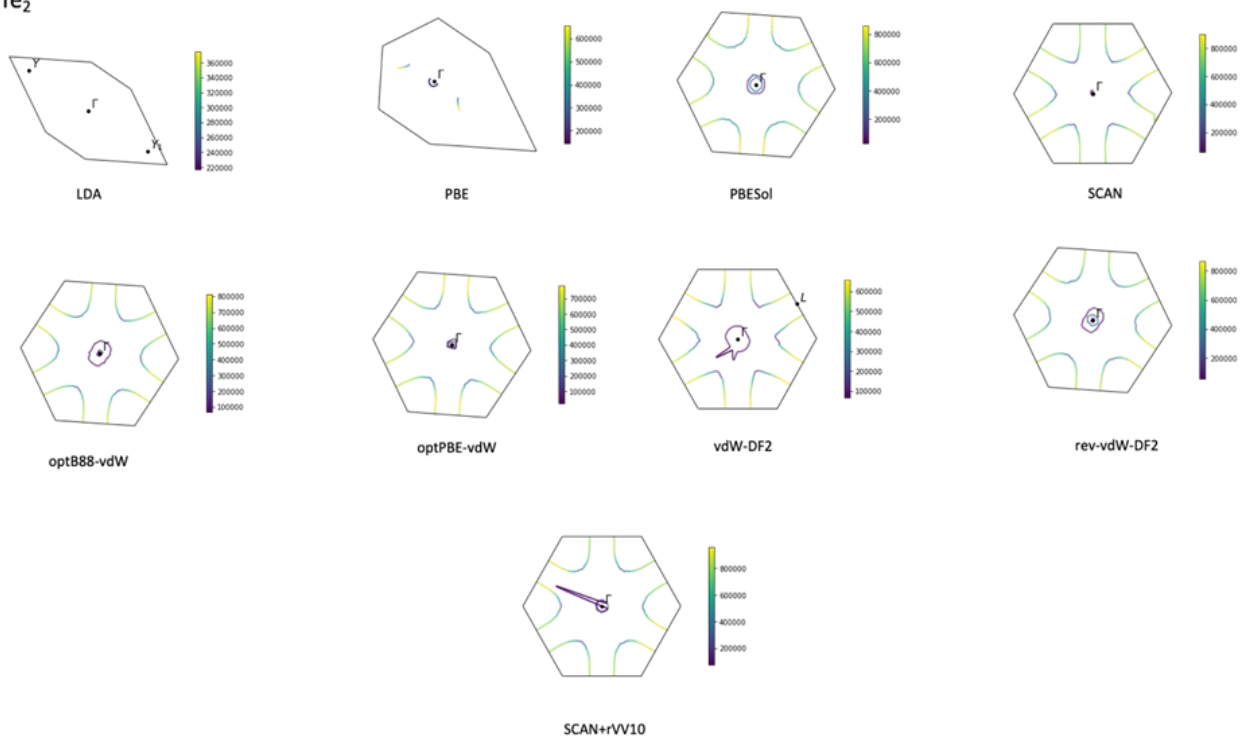

**Figure S22:** Fermi surface plots for 1T phase of TaTe<sub>2</sub> all 09 XC functional (top level for LDA, PBE, PBESol, SCAN from left to right; bottom level for optB88-vdW, optPBE-vdW, vdW-DF2, rev-vdW-DF2 and SCAN+rVV10 from left to right) in absence of SOC.

### 2H-TaTe<sub>2</sub>

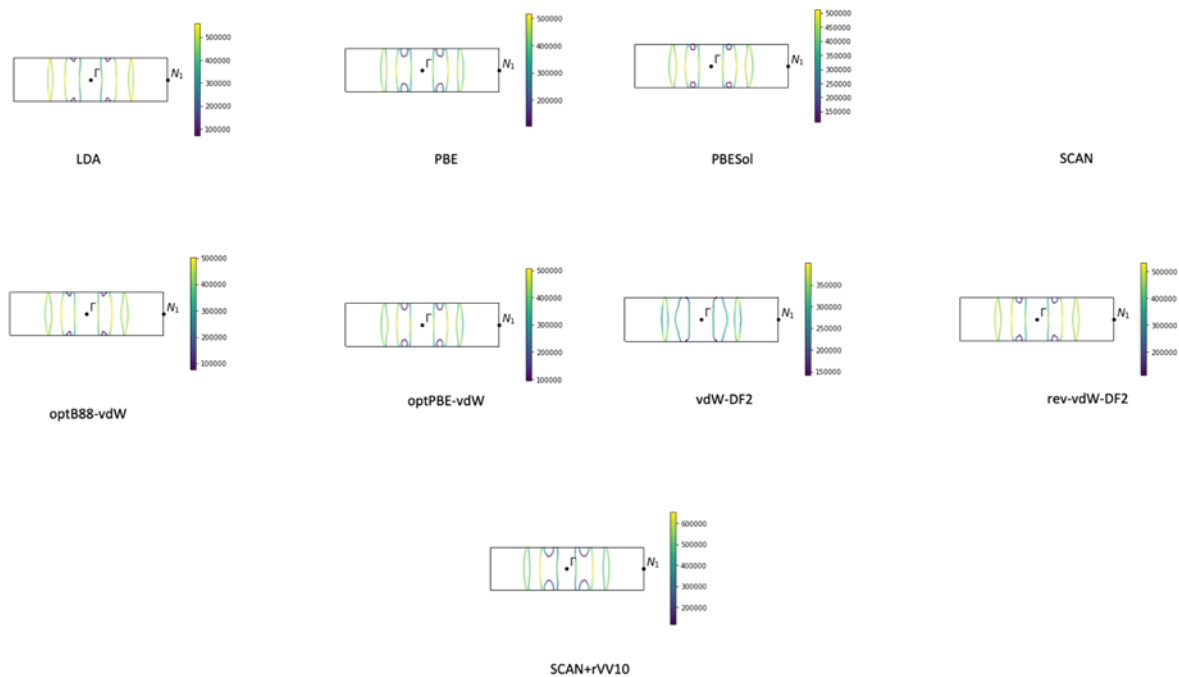

**Figure S23:** Fermi surface plots for 2H phase of TaTe<sub>2</sub> all 09 XC functional in absence of SOC.

## Spin orbit Coupling (SOC) Case:

Similarly, the SOC optimization is complete for 1T phases of 6 systems which are shown below in tabular form.

**Table S11:** Details of the Energy comparison of SOC with NSOC (1T) geometry optimization for all the 06 systems are tabulated below for 04 XC and 05 vdW-DF functional in SOC case. Phase. It is noticed from the above table, the energy difference is in positive range, showing the energetic dynamic nature of SOC compared to NSOC case. The energy values are nearly same and higher in SOC case.

| $f_{XC}$ | Phase | System            | NSOC<br>(eV/atom) | SOC (eV/atom) | Difference<br>(eV/atom) |
|----------|-------|-------------------|-------------------|---------------|-------------------------|
| LDA      | 1T    | NbS <sub>2</sub>  | -7.9093           | -7.9276       | 0.0183                  |
|          |       | NbSe <sub>2</sub> | -7.3420           | -7.3755       | 0.0335                  |
|          |       | NbTe <sub>2</sub> | -6.7006           | -6.7914       | 0.0908                  |
|          |       | TaS <sub>2</sub>  | -8.5216           | -8.5633       | 0.0417                  |
|          |       | TaSe <sub>2</sub> | -7.8872           | -7.9464       | 0.0592                  |
|          |       | TaTe <sub>2</sub> | -7.1591           | -7.2792       | 0.1201                  |
| PBE      | 1T    | NbS <sub>2</sub>  | -7.1010           | -7.1186       | 0.0176                  |
|          |       | NbSe <sub>2</sub> | -6.5158           | -6.5480       | 0.0322                  |
|          |       | NbTe <sub>2</sub> | -5.8838           | -5.9716       | 0.0878                  |
|          |       | TaS <sub>2</sub>  | -7.7320           | -7.7724       | 0.0404                  |
|          |       | TaSe <sub>2</sub> | -7.0778           | -7.1352       | 0.0574                  |
|          |       | TaTe <sub>2</sub> | -6.3604           | -6.4763       | 0.1159                  |
| PBESol   | 1T    | NbS <sub>2</sub>  | -7.5761           | -7.5938       | 0.0177                  |
|          |       | NbSe <sub>2</sub> | -7.0159           | -7.0475       | 0.0316                  |
|          |       | NbTe <sub>2</sub> | -6.3976           | -6.4850       | 0.0874                  |
|          |       | TaS <sub>2</sub>  | -8.2058           | -8.2464       | 0.0406                  |
|          |       | TaSe <sub>2</sub> | -7.5774           | -7.6350       | 0.0576                  |
|          |       | TaTe <sub>2</sub> | -6.8728           | -6.9880       | 0.1152                  |
| SCAN     | 1T    | NbS <sub>2</sub>  | -18.5616          | -18.5782      | 0.0166                  |
|          |       | NbSe <sub>2</sub> | -25.3056          | -25.3360      | 0.0304                  |
|          |       | NbTe <sub>2</sub> | -36.3233          | -36.4073      | 0.0840                  |
|          |       | TaS <sub>2</sub>  | -29.7512          | -29.7904      | 0.0392                  |

|             |    |                   |          |          |        |
|-------------|----|-------------------|----------|----------|--------|
|             |    | TaSe <sub>2</sub> | -36.4291 | -36.4842 | 0.0551 |
|             |    | TaTe <sub>2</sub> | -47.3592 | -47.4712 | 0.1120 |
| optB88-vdW  | 1T | NbS <sub>2</sub>  | -5.2066  | -6.3385  | 1.1319 |
|             |    | NbSe <sub>2</sub> | -4.5201  | -5.7501  | 1.2300 |
|             |    | NbTe <sub>2</sub> | -3.6728  | -5.1115  | 1.4387 |
|             |    | TaS <sub>2</sub>  | -5.9236  | -6.9390  | 1.0154 |
|             |    | TaSe <sub>2</sub> | -5.1703  | -6.2839  | 1.1136 |
|             |    | TaTe <sub>2</sub> | -4.2432  | -5.5700  | 1.3268 |
| optPBE-vdW  | 1T | NbS <sub>2</sub>  | -5.0613  | -6.2161  | 1.1548 |
|             |    | NbSe <sub>2</sub> | -4.3643  | -5.6133  | 1.2490 |
|             |    | NbTe <sub>2</sub> | -3.5169  | -4.9766  | 1.4597 |
|             |    | TaS <sub>2</sub>  | -5.7871  | -6.8193  | 1.0322 |
|             |    | TaSe <sub>2</sub> | -5.0243  | -6.1554  | 1.1311 |
|             |    | TaTe <sub>2</sub> | -4.0969  | -5.4439  | 1.3470 |
| vdW-DF2     | 1T | NbS <sub>2</sub>  | -4.7365  | -5.8835  | 1.1470 |
|             |    | NbSe <sub>2</sub> | -3.9996  | -5.2423  | 1.2427 |
|             |    | NbTe <sub>2</sub> | -3.1393  | -4.5963  | 1.4570 |
|             |    | TaS <sub>2</sub>  | -5.4015  | -6.4328  | 1.0313 |
|             |    | TaSe <sub>2</sub> | -4.5996  | -5.7306  | 1.1310 |
|             |    | TaTe <sub>2</sub> | -3.6684  | -5.0212  | 1.3528 |
| rev-vdW-DF2 | 1T | NbS <sub>2</sub>  | -5.5384  | -6.5986  | 1.0602 |
|             |    | NbSe <sub>2</sub> | -4.8663  | -6.0089  | 1.1426 |
|             |    | NbTe <sub>2</sub> | -4.0477  | -5.3798  | 1.3321 |
|             |    | TaS <sub>2</sub>  | -6.2621  | -7.2163  | 0.9542 |
|             |    | TaSe <sub>2</sub> | -5.5235  | -6.5648  | 1.0413 |
|             |    | TaTe <sub>2</sub> | -4.6222  | -5.8569  | 1.2347 |
| SCAN+rVV10  | 1T | NbS <sub>2</sub>  | -18.4604 | -18.5776 | 0.1172 |
|             |    | NbSe <sub>2</sub> | -25.1990 | -25.3360 | 0.1370 |
|             |    | NbTe <sub>2</sub> | -36.2079 | -36.4077 | 0.1998 |
|             |    | TaS <sub>2</sub>  | -29.6609 | -29.7838 | 0.1229 |
|             |    | TaSe <sub>2</sub> | -36.3306 | -36.4762 | 0.1456 |
|             |    | TaTe <sub>2</sub> | -47.2474 | -47.4614 | 0.2140 |

The electronic band structures for the SOC cases are shown below;

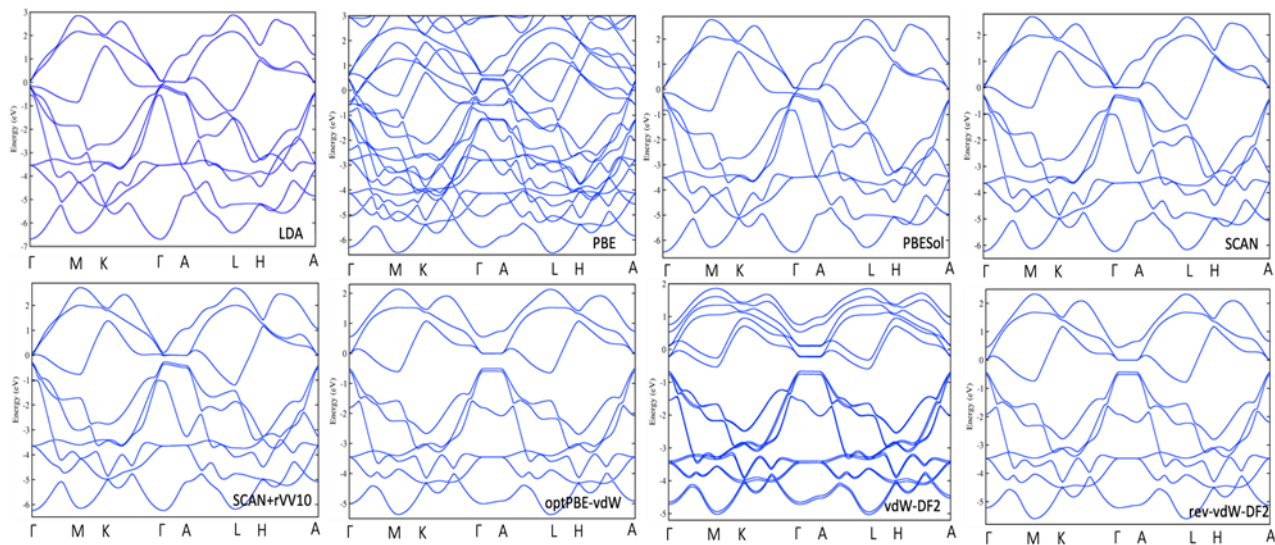

**Figure S24:** The electronic band structures of 1T-NbS<sub>2</sub> for the SOC cases.

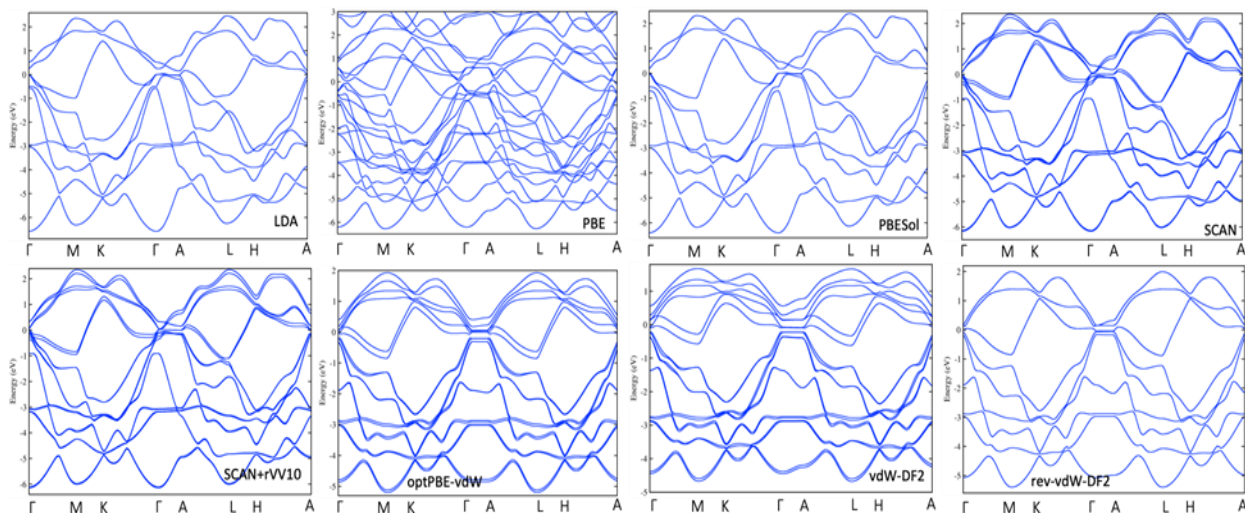

**Figure S25:** The electronic band structures of 1T-NbSe<sub>2</sub> for the SOC cases.

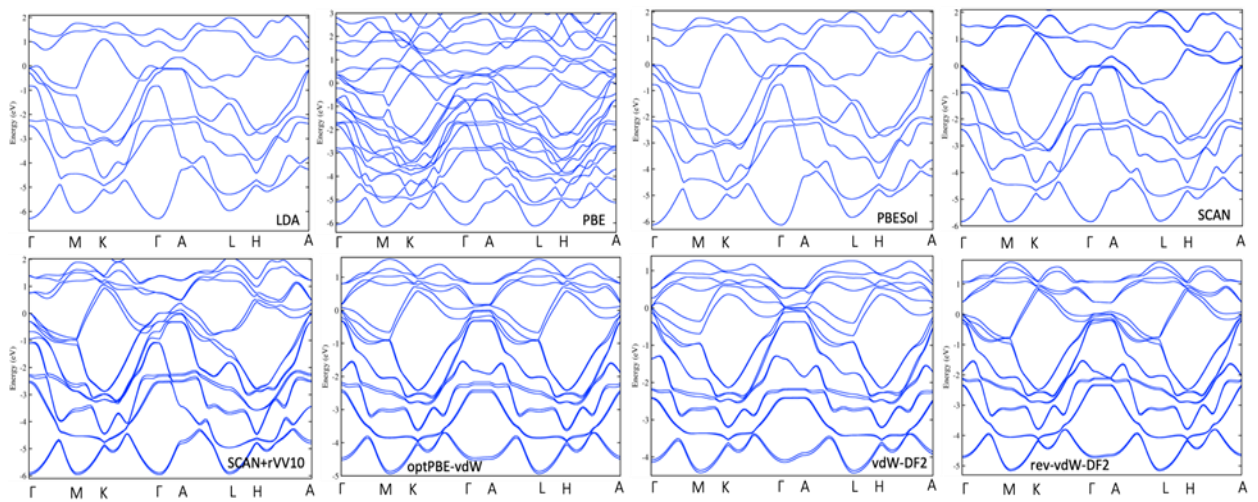

**Figure S26:** The electronic band structures of 1T-NbTe<sub>2</sub> for the SOC cases.

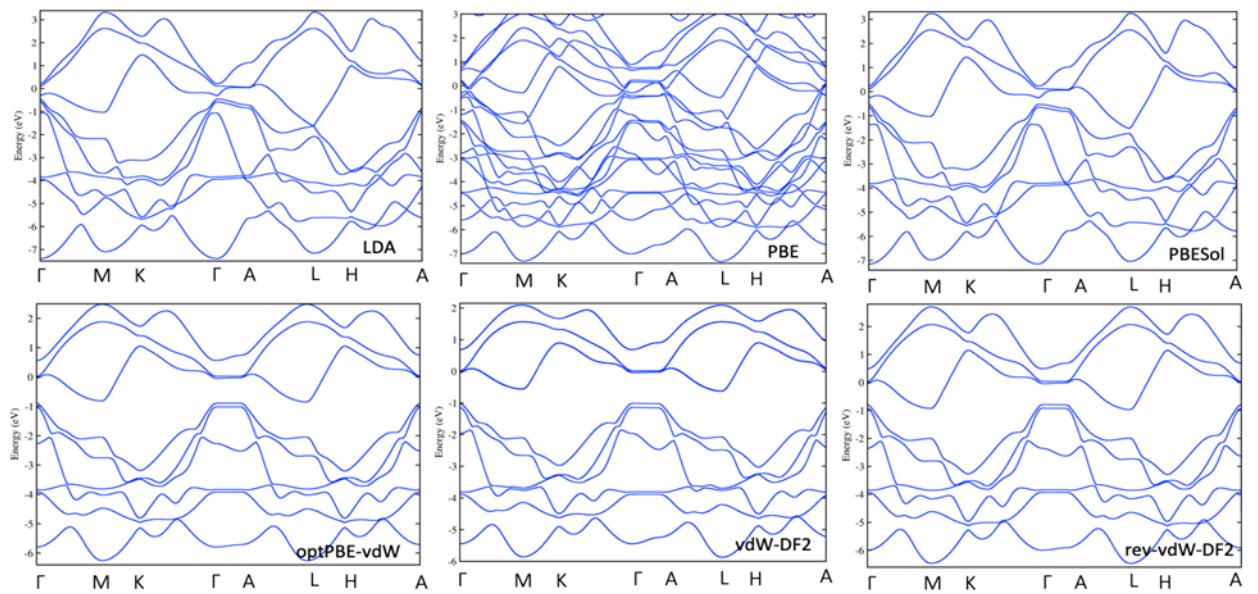

**Figure S27:** The electronic band structures of 1T-TaS<sub>2</sub> for the SOC cases.

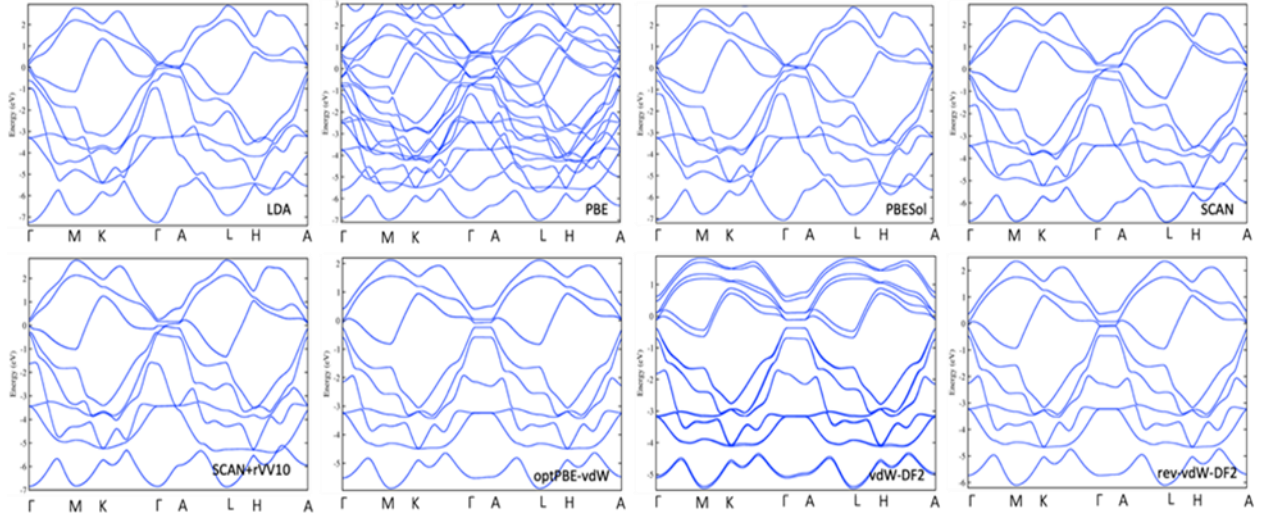

**Figure S28:** The electronic band structures of 1T-TaSe<sub>2</sub> for the SOC cases.

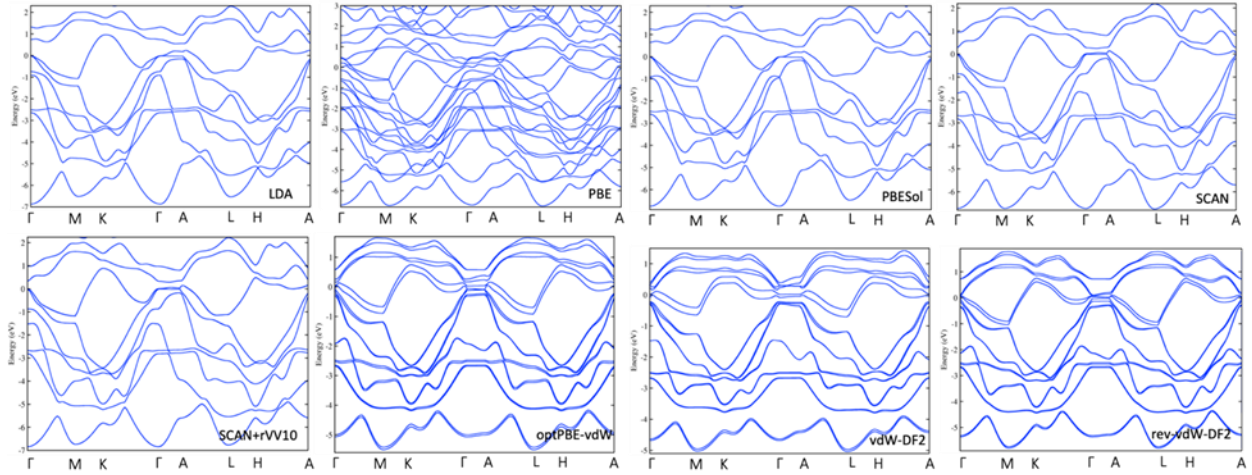

**Figure S29:** The electronic band structures of 1T-TaTe<sub>2</sub> for the SOC cases.

Here, the Fermi surfaces from both NSOC and SOC cases are compared. It is noticed that both cases, the surface is almost same, irrespective of case. As, Fermi surfaces of maximum systems are shown for NSOC cases, we skip to show them for SOC cases. One case of Fermi surface comparison in 2D plotter form for NbS<sub>2</sub> in 1T phase has been shown in Figure 5. Similarly, the bands and density of states plot in both SOC and NSOC cases are compared, it has been noticed that both are well matching with each other with very minor deviation. Here, one case of 1T-NbS<sub>2</sub> has been shown in Figure S31 (for band) and Figure 5 (c) for DOS plot.

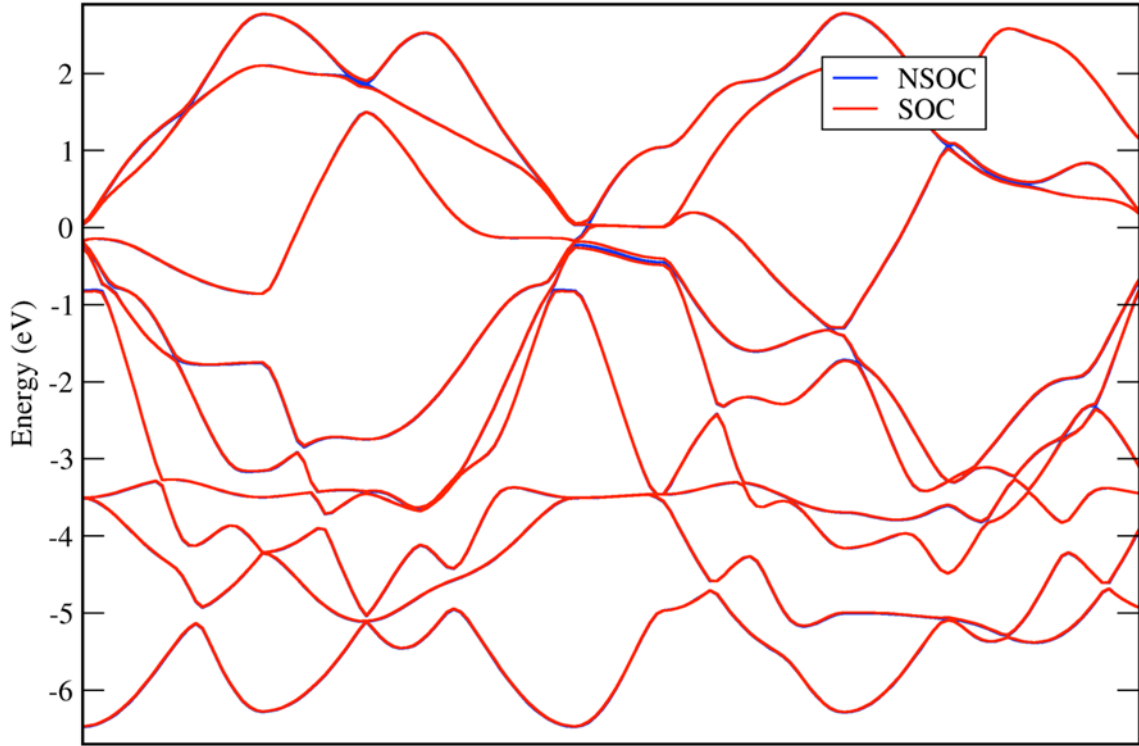

**Figure S30:** The band structure of 1T-NbS<sub>2</sub> for the both NSOC and SOC cases.

**References:**

- [1] Patil, U.; Caffrey, N, M.; Composition dependence of the charge-driven phase transition in group-VI transition metal dichalcogenides. *Physics Review B* 100, 075424, 2019.
- [2] Qu, Y.; et. al. Hydrogenation-controlled phase transition on two-dimensional transition metal dichalcogenides and their unique physical and catalytic properties. *Scientific Reports*, 6:34186, 2016.
- [3] Shao, D., Luo, X., Lu, W. et al. Spin-orbit coupling enhanced superconductivity in Bi-rich compounds ABi<sub>3</sub> (A = Sr and Ba). *Sci Rep* 6, 21484 (2016).
